# Supplementary material
Source: PubMed Central journal article supplement (PMC8145153)

## Supplementary Online Content

Kanwal F, Hernaez R, Liu Y, et al. Factors associated with access to and receipt of liver transplantation in veterans with end-stage liver disease. *JAMA Intern Med.* Published online May 24, 2021. doi:10.1001/jamainternmed.2021.2051

**eMethods 1.** MELD-Na Score Calculation

**eMethods 2.** Ascertainment of Referral

**eMethods 3.** Handling Missing Data

**eMethods 4.** Frailty Models

**eMethods 5.** Taxonomy Used to Guide Abstraction of Reasons for Nonreferral

**eTable 1.** Association Between Clinical and Clinical-Patient Factors and Referral, Wait-Listing and Transplantation in Patients with Limited Comorbidity (CirCom 0 or 1).

**eTable 2.** Association Between Clinical and Clinical-Patient Factors and Referral, Wait-Listing and Transplantation in Patients Who Survived for >12 Months Following Meeting MELD-Na Criteria

**eTable 3.** Association Between Clinical and Clinical-Patient Factors and Referral, Wait-Listing and Transplantation in Patients With Persistently High MELD-Na (>15) Throughout Follow-Up

**eTable 4.** Association Between Clinical and Clinical-Patient Factors and Referral, Wait-Listing and Transplantation in Patients With Complete Data on all Covariates

**eTable 5.** Association Between Clinical and Clinical-Patient Factors and Referral, Wait-Listing and Transplantation in Patients Who Entered the Study Cohort Before vs After the Implementation of Organ Allocation Policy (Regional Share 35) in June 2013

**eTable 6.** Association Between Clinical and Clinical-Patient Factors and Referral, Wait-Listing and Transplantation in Patients Who Entered the Study Cohort Before vs After Revisions to Awarding Hepatocellular Cancer Exception Points (October 2015)

**eFigure.** Cohort Selection

This supplementary material has been provided by the authors to give readers additional information about their work.

## eMethods 1. MELD-Na Score Calculation

We calculated the model for end-stage liver disease with sodium correction MELD-Na longitudinally using the values of serum bilirubin, international normalized ratio (INR), creatinine, and sodium tests performed within 6 months of each, using bilirubin test date as the anchor. In patients who had multiple tests (for example, multiple creatinine values) in the six months around a given bilirubin date, we chose the one closest to the anchor bilirubin test in calculating MELD-Na.

$$\text{MELDscore} = 10 * ((0.957 * \ln(\text{Creatinine})) + (0.378 * \ln(\text{Bilirubin})) + (1.12 * \ln(\text{INR}))) + 6.43$$

$$\text{MELDNascore} = \text{MELDscore} - \text{SerumNa} - (0.025 * \text{MELDscore} * (140 - \text{SerumNa})) + 140$$

Because MELD-Na can be spuriously high in patients on warfarin or those with chronic kidney disease, we removed patients if their MELD-Na values exceeded 15 while receiving warfarin treatment or if their MELD-Na values (at index) were primarily driven by high serum creatinine, which we defined as values >3.5 mg/dL in the presence of normal range bilirubin (<1.5 mg/dL) and INR (<1.5).

## eMethods 2. Ascertainment of Referral

To be considered for liver transplantation within the VA, patients are required to undergo an initial evaluation at their home facility; results of this evaluation are then reviewed by one of the 6 VA transplant centers. Patients who are referred to non-VA transplant centers for VA Purchased care also undergo this process, where a VA transplant center physician reviewer determines the eligibility for liver transplant evaluation. The evaluation and referral information are entered in the EMR using dedicated progress note templates with specific titles. We developed and validated an algorithm that used the specific progress note titles to identify liver transplantation referral within the VA.

We started with a broad keyword search to identify all mentions of the term *transplant* which included mentions that contained the root word, such as *transplantation* and *transplants* in the progress note titles for all patients in our cohort. We then selected a random test sample of 50 patients who had at least one progress note that met the search criteria. To refine our search to improve its precision (positive predictive value, PPV) for *actual referral*, we reviewed *all* progress notes for these patients to identify and record the exact (full) titles that were associated with the actual referral request. To ensure we did not miss any instances of referral, we then used an iterative process where we repeated the step above to identify additional titles. Specifically, after removing patients in our cohort who were classified as being referred based on findings of the previous step, we reviewed an additional 50 random cases with the keyword transplant in a note title to ascertain actual referral status and record referral-specific titles. We then repeated this process until no new note titles were identified suggesting we had a comprehensive list of titles that indicated *actual* referral for liver transplant. We have included the complete list of titles so identified in the **Table 1. Figure** below depicts our algorithm development process.

To further validate the completeness of the list, we compared actual referral rates in a random sample of 50 patients with notes from the list and 50 patients without such notes. All of the patients with notes were referred for transplantation and none without notes from the list were (**PPV for transplant referral 100%**). However, 3 out of 50 were referred for kidney rather than liver transplantation (**PPV for liver transplant referral 94%**). The 3 patients had chronic liver disease, but the high MELD-Na was driven by high serum creatinine (>2.0 mg/dL in all 3 cases) with serum bilirubin values <1.5 mg/dl and normal range INR.

To maximize the precision of our referral outcome, we again conducted targeted medical record reviews of all patients classified as referred but whose laboratory profile

indicated primary kidney dysfunction (serum creatinine >2.0 mg/dL and serum bilirubin values <1.5 mg/dL at the time of the index MELD-Na >15). Of the 117 such patients, 37 patients were referred for kidney transplantation only; we re-classified them as not referred for liver transplantation in further analyses. This hierarchical approach allowed complete ascertainment of referral for liver transplantation in our study cohort.

**Figure.** Development and validation of algorithm to define liver transplant referral

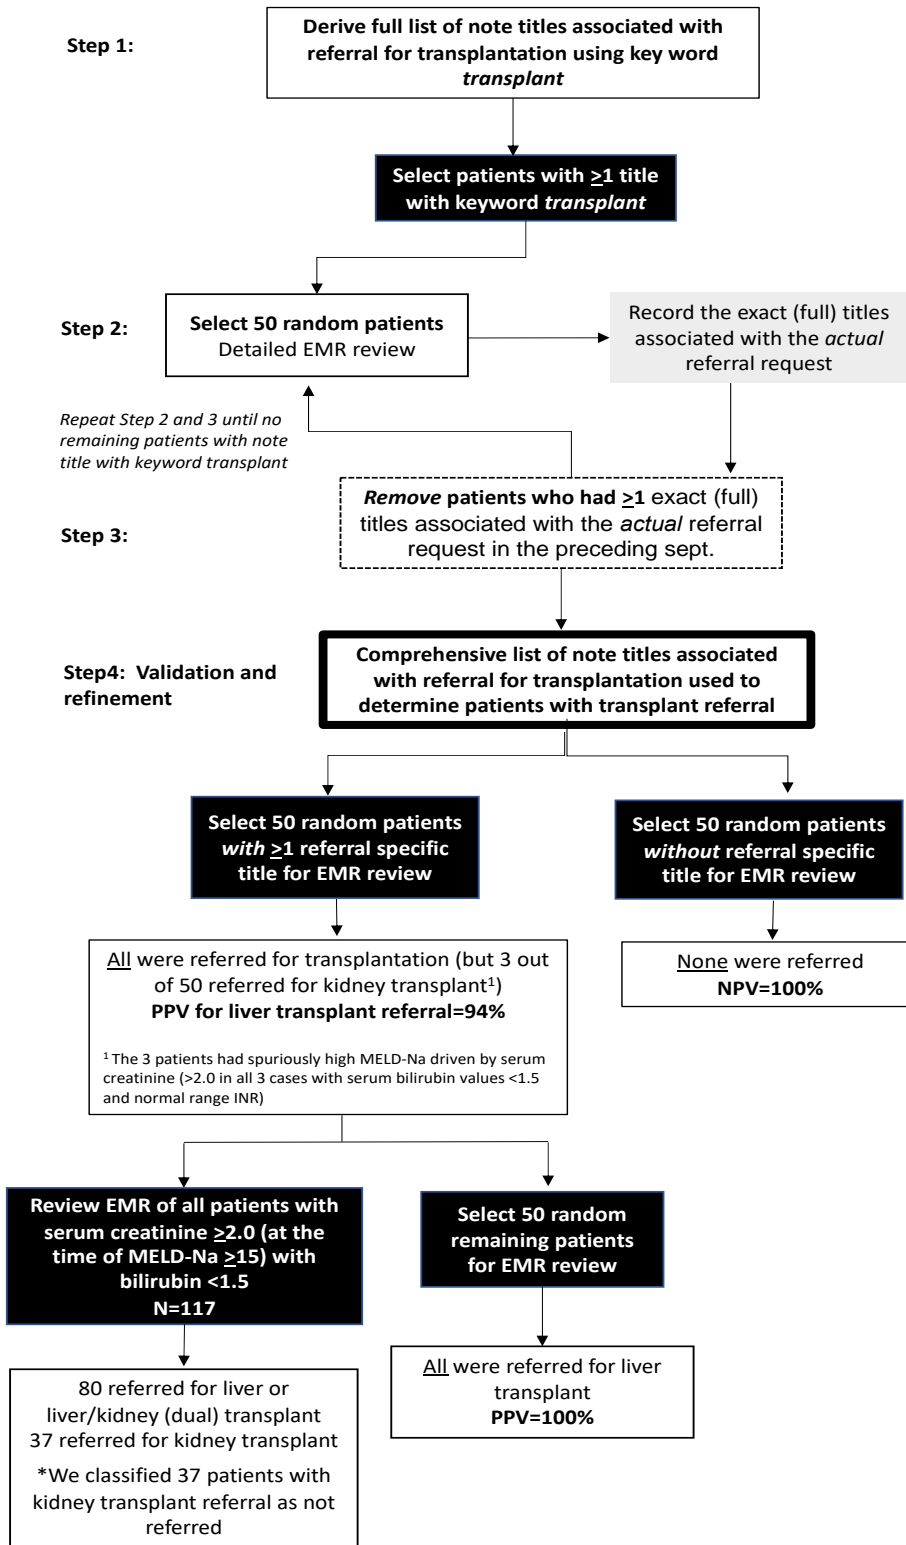

| <b>Table 1.</b> Complete list of titles used to identify liver transplant referral |
|------------------------------------------------------------------------------------|
| <b>RAW TIU Document Definition</b>                                                 |
| <b>PRE-TRANSPLANT</b>                                                              |
| PRE-TRANSPLANT/BHOST/BHIP ASSESSMENT                                               |
| PRE-TRANSPLANT/PHYSICIAN ASSESSMENT                                                |
| PRE-TRANSPLANT/VACO REFERRAL                                                       |
| <b>PHYSICIAN OR STAFF ASSESMENT</b>                                                |
| PHYSICIAN ASSESSMENT FOR TRANSPLANT CANDIDATE                                      |
| PHYSICIAN ASSESSMENT FOR TRANSPLANT CANDIDATES                                     |
| PHYSICIAN ASSESSMENT FOR TRANSPLANT CANDIDATES - T                                 |
| PHYSICIAN ASSESSMENT FOR TRANSPLANT CANDIDATES (T)                                 |
| PHYSICIAN TRANSPLANT CANDIDATE EVALUATION                                          |
| PHYSICIAN TRANSPLANT CANDIDATE EVALUATION NOTE                                     |
| STAFF PHYSICIAN ASSESSMENT FOR TRANSPLANT CANDIDAT                                 |
| VA STAFF PHYSICIAN ASSESSMENT FOR TRANSPLANT CANDI                                 |
| <b>PHYSICIAN SUMMARY FOR</b>                                                       |
| PHYSICIAN SUMMARY FOR TRANSPLANT                                                   |
| PHYSICIAN SUMMARY FOR TRANSPLANT (T)                                               |
| PHYSICIAN SUMMARY FOR TRANSPLANT (TP)                                              |
| PHYSICIAN SUMMARY FOR TRANSPLANT CANDIDATE                                         |
| PHYSICIAN SUMMARY FOR TRANSPLANT CANDIDATE (CI)(T)                                 |
| PHYSICIAN SUMMARY FOR TRANSPLANT CANDIDATE NOTE                                    |
| PHYSICIAN SUMMARY FOR TRANSPLANT CANDIDATE NOTE (T                                 |
| PHYSICIAN SUMMARY FOR TRANSPLANT CANDIDATES                                        |
| PHYSICIAN SUMMARY FOR TRANSPLANT CANDIDATES (T)                                    |
| PHYSICIAN SUMMARY FOR TRANSPLANT NOTE                                              |
| PHYSICIAN SUMMARY FOR TRANSPLANT-T                                                 |
| TRANSPLANT PHYSICIAN SUMMARY FOR TRANSPLANT CANDID                                 |
| <b>TRANSPLANT</b>                                                                  |
| TRANSPLANT CANDIDATE EVALUATION NOTE                                               |
| TRANSPLANT CANDIDATE EVALUATION NOTE/MEDICAL                                       |
| TRANSPLANT CANDIDATE PHYSICIAN EVALUATION                                          |
| TRANSPLANT CANDIDATE PHYSICIAN SUMMARY                                             |
| TRANSPLANT CANDIDATE VACO REFERRAL NOTE                                            |
| <b>TRANSPLANT REFERRAL</b>                                                         |
| TRANSPLANT REFERRAL                                                                |
| TRANSPLANT REFERRAL (BASE)                                                         |
| TRANSPLANT REFERRAL CANDIDATE NOTE (CI)                                            |
| TRANSPLANT REFERRAL CONSULT                                                        |
| TRANSPLANT REFERRAL FORM                                                           |
| TRANSPLANT REFERRAL FORM (SCANNED)                                                 |
| TRANSPLANT REFERRAL FORM NOTE                                                      |
| TRANSPLANT REFERRAL FORM VAF 10-0390                                               |
| TRANSPLANT REFERRAL FORM-MUSC-TL                                                   |

|                                                    |
|----------------------------------------------------|
| TRANSPLANT REFERRAL INPATIENT (C)                  |
| TRANSPLANT REFERRAL LETTER                         |
| TRANSPLANT REFERRAL NOTE                           |
| TRANSPLANT REFERRAL NOTE (T)                       |
| TRANSPLANT REFERRAL OLD                            |
| TRANSPLANT REFERRAL OUTPATIENT (C)                 |
| TRANSPLANT REFERRAL PACKET                         |
| TRANSPLANT REFERRAL RESPONSE TO CONSULT            |
| TRANSPLANT REFERRAL/DECISION (SCANNED)             |
| TRANSPLANT REFERRAL-NWI (T)                        |
| TRANSPLANT REFERRAL-PHYSICIAN ASSESSMENT/SUMMARY   |
| TRANSPLANT REFERRALS                               |
| <b>VACO</b>                                        |
| VACO TRANSPLANT REFERRAL                           |
| VACO TRANSPLANT REFERRAL - IC                      |
| VACO TRANSPLANT REFERRAL (595-DT-479)              |
| VACO TRANSPLANT REFERRAL (B)                       |
| VACO TRANSPLANT REFERRAL (CI)(DT)                  |
| VACO TRANSPLANT REFERRAL (D)                       |
| VACO TRANSPLANT REFERRAL (LINK SF)                 |
| VACO TRANSPLANT REFERRAL (RD)                      |
| VACO TRANSPLANT REFERRAL (SR)                      |
| VACO TRANSPLANT REFERRAL (T)                       |
| VACO TRANSPLANT REFERRAL (TP)                      |
| VACO TRANSPLANT REFERRAL FORM                      |
| VACO TRANSPLANT REFERRAL NOTE                      |
| VACO TRANSPLANT REFERRAL NOTE(O)(T)                |
| VACO TRANSPLANT REFERRAL STAFF PHYSICIAN ASSESSMEN |
| VACO TRANSPLANT REFERRAL SUMMARY                   |
| VACO TRANSPLANT REFERRAL T                         |
| VACO TRANSPLANT REFERRAL TEMPLATE                  |
| VACO TRANSPLANT REFERRAL(T)                        |
| VACO TRANSPLANT REFERRAL**LB 1/12                  |
| VACO TRANSPLANT REFERRAL-NOLA                      |
| VACO TRANSPLANT REFERRAL-TL                        |
| TRANSPLANT VACO TRANSPLANT REFERRAL (T)            |
| TRANSPLANT VACO TRANSPLANT REFERRAL                |
| <b>Others</b>                                      |
| LIVER TRANSPLANT - SELECTION CONFERENCE            |
| LIVER TRANSPLANT REVIEW COMMITTEE DECISION NOTE    |
| MED SVC PHYSICIAN SUMMARY FOR TRANSPLANT CANDIDATE |
| MTU - LIVER TRANSPLANT EVALUATION                  |
| TRANSPLANT MULTIDISCIPLINARY SELECTION CONFERENCE  |

### **eMethods 3. Handling Missing Data**

To handle missing data, data based Multiple Imputation (PROC MI and PROC MIANALYZE in SAS) with Fully Conditional Specification (FCS)[1] was conducted with 10 imputed datasets. We also allowed the primary outcomes to inform missingness patterns as is commonly recommended.[2] Subsequent to MI estimation, multivariable Cox regression models with  $\Gamma$  frailty was specified to account for the correlation between patients clustered within VA facility. Estimated hazard ratios and 95% confidence intervals were reported from the pooled estimates across the 10 imputed datasets using Rubin's rule; for each model, the pooled p-values were also adjusted using the Benjamini Hochberg False-Discovery-Rate (FDR) method to conservatively account for the many covariate and tests of statistical significance in the multivariable frailty models [3]. The FDR is the estimated proportion of null estimates that are falsely rejected among the set of null parameter estimates in the frailty models that were identified as statistically significant.

### **Data-Based Multiple Imputation Diagnostics**

Table 2 presents the MI diagnostics across 10 imputed datasets using SAS PROC MI with Fully Conditional Specification (FCS). We focus on the Fraction of Missing Information (FMI) and Relative Efficiency (RE) diagnostics from the MI estimation. The FMI provides an estimate of the total variance due to the missing data for each variable; lower FMIs suggest less influence of imputation sampling variance in contribution to the overall variance of each variable. RE incorporates FMI and an RE estimate closer to 1.00 suggests the estimates of the population parameters in the frailty models are close to population parameter estimates that would be estimated if there were not missing data; estimates lower than 1.00 suggest the parameter estimates are proportionally less efficient (higher variance) as a result of the amount of missing data and imputation datasets ( $k=10$ ) across which pooling of frailty model estimates is performed.

Across the 20 predictors in models that had some degree of missing data, the FMI had a Mean=.012 (SD = .025, SE=.006), a Median FMI=.004, a Minimum FMI < .001, and a Maximum FMI = .112 (**Table 2**). With the exception of ethnicity, sampling variance attributable to the missing data was very low, and only slightly higher for ethnicity. Accordingly, the impact on RE estimates of missing data imputation was also limited with RE remaining near 1.00 for all imputed variables with the RE Mean=.999 (SD = .002,



SE=.001), a Median RE = .999, a Minimum RE = .989, and a Maximum RE > .999. To the authors' knowledge, there are no specific thresholds for which RE is thought to be too low, though these RE estimates all are quite close to 1.00 which suggests strong relative efficiency of the MI frailty model estimates.

| Variable                           | Variance |        |        | Relative                | Fraction               | Relative   |
|------------------------------------|----------|--------|--------|-------------------------|------------------------|------------|
|                                    | Between  | Within | Total  | Increase<br>in Variance | Missing<br>Information | Efficiency |
| MELD-Na                            | 0.0000   | 0.0000 | 0.0000 | 0.0406                  | 0.0393                 | 0.9961     |
| Ascites                            | 0.0000   | 0.0037 | 0.0037 | 0.0054                  | 0.0054                 | 0.9995     |
| Hepatic encephalopathy             | 0.0000   | 0.0025 | 0.0025 | 0.0045                  | 0.0044                 | 0.9996     |
| Hepatocellular cancer              | 0.0000   | 0.0029 | 0.0029 | 0.0083                  | 0.0083                 | 0.9992     |
| Varices                            | 0.0000   | 0.0031 | 0.0031 | 0.0040                  | 0.0040                 | 0.9996     |
| Depression                         | 0.0000   | 0.0027 | 0.0027 | 0.0041                  | 0.0041                 | 0.9996     |
| Anxiety                            | 0.0000   | 0.0047 | 0.0048 | 0.0045                  | 0.0045                 | 0.9995     |
| Race/ethnicity                     | 0.0020   | 0.0179 | 0.0201 | 0.1230                  | 0.1119                 | 0.9889     |
| Age                                | 0.0001   | 1.0044 | 1.0045 | 0.0001                  | 0.0001                 | 1.0000     |
| Sex                                | 0.0002   | 0.0163 | 0.0164 | 0.0102                  | 0.0101                 | 0.9990     |
| Etiology                           | 0.0002   | 0.0124 | 0.0127 | 0.0189                  | 0.0186                 | 0.9981     |
| VA Priority status                 | 0.0000   | 0.0050 | 0.0051 | 0.0061                  | 0.0061                 | 0.9994     |
| Health Insurance                   | 0.0001   | 0.0260 | 0.0260 | 0.0023                  | 0.0023                 | 0.9998     |
| CIRCOM Score                       | 0.0000   | 0.0044 | 0.0044 | 0.0062                  | 0.0061                 | 0.9994     |
| Facility complexity                | 0.0001   | 0.0202 | 0.0203 | 0.0044                  | 0.0044                 | 0.9996     |
| Distance to transplant facility    | 0.0000   | 0.0086 | 0.0086 | 0.0034                  | 0.0033                 | 0.9997     |
| Transplant Center                  | 0.0001   | 0.0309 | 0.0310 | 0.0027                  | 0.0027                 | 0.9997     |
| Region                             | 0.0000   | 0.0205 | 0.0205 | 0.0023                  | 0.0023                 | 0.9998     |
| Volume of cirrhosis cases/facility | 0.0001   | 0.0332 | 0.0333 | 0.0033                  | 0.0033                 | 0.9997     |

## References:

- [1]. Van Buuren, S, J P L Brand, C G M Groothuis-Oudshoorn, and D B Rubin. "Fully conditional specification in multivariate imputation." *Journal of Statistical Computation and Simulation*, 2006.
- [2]. Moons, K G, R A Donders, Stijnen T, and Harrell F E. "Using the outcome for imputation of missing predictor values was preferred." *Journal of Clinical Epidemiology*, 2006: 1092 - 1101.
- [3] Benjamini Y, Hochberg Y. Controlling the false discovery rate: A practical and powerful approach to multiple testing. *Journal of the Royal Statistical Society: Series B*. Available at: <https://rss.onlinelibrary.wiley.com/doi/abs/10.1111/j.2517-6161.1995.tb02031.x>

#### **eMethods 4. Frailty Models**

We specified frailty models. We accounted for clustering of outcomes by hospital using a gamma-distributed frailty. We assessed the frailty random effect via the pooled estimate of the frailty across the 10 multiply imputed datasets for both referral and waitlisting models.

With this pooled variance estimate, we computed an estimate of *Kendall's*  $\tau = \frac{\theta}{\theta+2}$  where  $\theta$  is the pooled frailty variance and the resulting tau represents is an estimate of Kendall's  $\tau$  correlation coefficient. This estimate can be interpreted as the degree of similarity between any two patients' times to event within each facility. In this respect, the  $\tau$  is similar to the Intra-Class Correlation estimate commonly reported in generalized linear mixed effects models.

For each of the 10 imputed datasets, the frailty random effect was statistically significantly different from 0.00 with all  $p$  values  $< .0001$  for the referral model and all  $p$ -values  $< .01$  for the waitlisting model. For the referral model, the pooled frailty was 0.292 and for the waitlisting model, the pooled frailty was 0.07. The  $\tau$  was 0.127 and 0.034 for the consideration of referral and waitlisting models. These results show statistically significant variation in referral and waitlisting that relates to the facility where the patient seeks care.

We did not estimate  $\tau$  for the transplantation models due to relatively few individuals who underwent transplantation.

**Reference:** Hougaard P (2000). Analysis of Multivariate Survival Data. Springer-Verlag.

## **eMethods 5.** Taxonomy Used to Guide Abstraction of Reasons for Nonreferral

We adapted a published taxonomy originally developed to understand reasons why clinicians do not provide guidelines recommended treatments for heart failure. [1] This taxonomy includes:

- **Prioritization and assessment of patient benefit:** Examples included instances where benefit may not outweigh potential harms, such as in individuals with advanced age or comorbidity, and patients who experience improvement in liver function with medical management.
- **Adverse effect of treatment.** Examples included advanced hepatocellular cancer that is not amenable to transplantation and liver transplantation may indeed increase the risk of mortality in the short term.
- **Non-adherence to treatment recommendations and monitoring.** Examples included ongoing alcohol and drug use as well as limited social support and uncontrolled mental health comorbidity that could influence patients' ability to adhere to recommended treatments.
- **Patient preference and other contextual reasons.** Examples included patient's life circumstances and treatment goals.

This taxonomy is also consistent with the general guidance included in the **AASLD guidelines** for evaluation of patients for liver transplantation. [2] We have added this information in the Supplementary Materials.

### **Reference**

1. Steinman MA, Patil S, Kamat P, Peterson C, Knight SJ. A taxonomy of reasons for not prescribing guideline-recommended medications for patients with heart failure. *Am J Geriatr Pharmacother.* 2010;8(6):583-594.
2. Martin P, DiMartini A, Feng S, Brown R, Jr., Fallon M. Evaluation for liver transplantation in adults: 2013 practice guideline by the American Association for the Study of Liver Diseases and the American Society of Transplantation. *Hepatology.* 2014;59(3):1144-1165.

**eTable 1.** Association Between Clinical and Clinical-Patient Factors and Referral, Wait-Listing and Transplantation in Patients with Limited Comorbidity (CirCom 0 or 1).

|                                 | Referral         |                      | Waitlisting      |                      | Transplant       |                      |
|---------------------------------|------------------|----------------------|------------------|----------------------|------------------|----------------------|
| Total N patients                | 17,126           |                      | 17,126           |                      | 17,126           |                      |
| Outcome events, n               | 1,238            |                      | 894              |                      | 525              |                      |
|                                 | Adj HR (95% CI)  | P-value <sup>a</sup> | Adj HR (95% CI)  | P-value <sup>a</sup> | Adj HR (95% CI)  | P-value <sup>a</sup> |
| <b>Clinical characteristics</b> |                  |                      |                  |                      |                  |                      |
| <b>Cirrhosis etiology</b>       |                  |                      |                  |                      |                  |                      |
| HCV alone                       | ref              |                      | ref              |                      | ref              |                      |
| Alcohol alone                   | 0.40 (0.34-0.47) | <.0001               | 0.33 (0.27-0.41) | <.0001               | 0.30 (0.23-0.40) | <.0001               |
| HCV and alcohol                 | 0.56 (0.48-0.66) | <.0001               | 0.53 (0.44-0.64) | <.0001               | 0.60 (0.47-0.77) | 0.00                 |
| NASH                            | 0.97 (0.81-1.17) | 0.85                 | 0.80 (0.65-0.99) | 0.07                 | 0.95 (0.73-1.24) | 0.78                 |
| Other                           | 0.75 (0.58-0.98) | 0.07                 | 0.73 (0.55-0.97) | 0.06                 | 0.70 (0.48-1.02) | 0.12                 |
| <b>Na-MELD score</b>            |                  |                      |                  |                      |                  |                      |
| <20                             | ref              |                      | ref              |                      | ref              |                      |
| 20-24                           | 1.40 (1.19-1.64) | 0.00                 | 1.47 (1.22-1.78) | 0.00                 | 1.39 (1.09-1.76) | 0.02                 |
| 25-29                           | 1.55 (1.29-1.87) | <.0001               | 1.74 (1.42-2.13) | <.0001               | 2.20 (1.71-2.83) | <.0001               |
| 30 and higher                   | 1.81 (1.48-2.21) | <.0001               | 1.41 (1.08-1.84) | 0.02                 | 1.94 (1.37-2.75) | 0.00                 |
| <b>Cirrhosis complications</b>  |                  |                      |                  |                      |                  |                      |
| Hepatic encephalopathy          | 2.14 (1.89-2.42) | <.0001               | 2.03 (1.76-2.35) | <.0001               | 2.04 (1.69-2.46) | <.0001               |
| Ascites                         | 2.08 (1.77-2.45) | <.0001               | 1.87 (1.56-2.24) | <.0001               | 2.16 (1.69-2.76) | <.0001               |
| Varices                         | 2.27 (1.96-2.63) | <.0001               | 1.80 (1.53-2.13) | <.0001               | 1.50 (1.21-1.86) | 0.00                 |
| Hepatocellular cancer           | 1.75 (1.54-1.99) | <.0001               | 1.59 (1.36-1.85) | <.0001               | 1.91 (1.57-2.31) | <.0001               |
| <b>Cir-COM score</b>            |                  |                      |                  |                      |                  |                      |
| 0                               | ref              |                      | ref              |                      | ref              |                      |
| 1+0                             | 0.76 (0.67-0.86) | <.0001               | 0.62 (0.54-0.72) | <.0001               | 0.57 (0.47-0.69) | <.0001               |
| <b>Socio-demographics</b>       |                  |                      |                  |                      |                  |                      |
| <b>Age group (years)</b>        |                  |                      |                  |                      |                  |                      |
| <55                             | ref              |                      | ref              |                      | ref              |                      |
| 55-59                           | 0.84 (0.72-0.99) | 0.07                 | 0.76 (0.63-0.92) | 0.01                 | 0.71 (0.55-0.92) | 0.02                 |
| 60-64                           | 0.80 (0.68-0.93) | 0.01                 | 0.68 (0.57-0.81) | <.0001               | 0.69 (0.55-0.88) | 0.01                 |
| 65-70                           | 0.45 (0.37-0.56) | <.0001               | 0.47 (0.38-0.59) | <.0001               | 0.49 (0.37-0.66) | <.0001               |
| 70 and older                    | 0.11 (0.07-0.19) | <.0001               | 0.08 (0.04-0.16) | <.0001               | 0.09 (0.04-0.20) | <.0001               |
| <b>Gender</b>                   |                  |                      |                  |                      |                  |                      |
| Female                          | ref              |                      | ref              |                      | ref              |                      |
| Male                            | 0.82 (0.60-1.11) | 0.31                 | 0.81 (0.57-1.16) | 0.37                 | 1.24 (0.72-2.13) | 0.58                 |
| <b>Race/ethnicity</b>           |                  |                      |                  |                      |                  |                      |
| White                           | ref              |                      | ref              |                      | ref              |                      |
| African American                | 0.82 (0.68-0.99) | 0.07                 | 0.78 (0.64-0.96) | 0.03                 | 0.79 (0.60-1.03) | 0.15                 |
| Hispanic                        | 1.05 (0.85-1.30) | 0.78                 | 0.99 (0.77-1.28) | 0.96                 | 0.92 (0.64-1.33) | 0.78                 |
| Other                           | 1.04 (0.73-1.47) | 0.87                 | 0.92 (0.60-1.41) | 0.78                 | 0.89 (0.50-1.59) | 0.78                 |
| <b>Insurance status</b>         |                  |                      |                  |                      |                  |                      |
| VA-Private                      | ref              |                      | ref              |                      | ref              |                      |
| VA-Medicare                     | 1.09 (0.94-1.26) | 0.36                 | 0.92 (0.79-1.08) | 0.41                 | 0.90 (0.73-1.09) | 0.41                 |
| VA-Medicaid                     | 0.74 (0.50-1.08) | 0.22                 | 0.43 (0.26-0.71) | 0.00                 | 0.42 (0.21-0.83) | 0.03                 |

|                                                              |                  |      |                  |        |                  |        |
|--------------------------------------------------------------|------------------|------|------------------|--------|------------------|--------|
| VA only                                                      | 0.79 (0.67-0.94) | 0.02 | 0.42 (0.34-0.52) | <.0001 | 0.32 (0.24-0.43) | <.0001 |
| <b>Region</b>                                                |                  |      |                  |        |                  |        |
| Northeast                                                    | ref              |      | ref              |        | ref              |        |
| Midwest                                                      | 0.96 (0.71-1.28) | 0.85 | 0.88 (0.67-1.16) | 0.45   | 0.97 (0.68-1.39) | 0.88   |
| South                                                        | 0.95 (0.73-1.23) | 0.78 | 0.70 (0.55-0.90) | 0.01   | 0.86 (0.62-1.18) | 0.48   |
| West                                                         | 0.83 (0.61-1.12) | 0.32 | 0.55 (0.41-0.74) | 0.00   | 0.60 (0.40-0.88) | 0.02   |
| <b>Priority status</b>                                       |                  |      |                  |        |                  |        |
| 6-8                                                          | ref              |      | ref              |        | ref              |        |
| 1-3                                                          | 1.04 (0.88-1.23) | 0.78 | 0.88 (0.73-1.06) | 0.27   | 0.75 (0.60-0.95) | 0.03   |
| 4-5                                                          | 0.83 (0.71-0.98) | 0.06 | 0.68 (0.56-0.81) | <.0001 | 0.64 (0.51-0.80) | 0.00   |
| <b>Depression</b>                                            | 0.84 (0.73-0.95) | 0.02 | 0.86 (0.74-1.00) | 0.08   | 0.88 (0.72-1.07) | 0.32   |
| <b>Anxiety</b>                                               | 1.00 (0.84-1.20) | 0.99 | 0.95 (0.77-1.17) | 0.71   | 0.93 (0.70-1.24) | 0.78   |
| <b>Facility characteristics</b>                              |                  |      |                  |        |                  |        |
| <b>Complexity level</b>                                      |                  |      |                  |        |                  |        |
| Low/Median Complexity                                        | ref              |      | ref              |        | ref              |        |
| High Complexity                                              | 1.00 (0.74-1.36) | 0.99 | 1.04 (0.76-1.43) | 0.85   | 0.90 (0.59-1.35) | 0.76   |
| <b>Facility cirrhosis volume</b>                             |                  |      |                  |        |                  |        |
| Low                                                          | ref              |      | ref              |        | ref              |        |
| Medium                                                       | 0.81 (0.58-1.12) | 0.32 | 0.84 (0.59-1.18) | 0.41   | 0.92 (0.58-1.46) | 0.78   |
| Medium-high                                                  | 0.86 (0.58-1.27) | 0.58 | 1.02 (0.68-1.54) | 0.96   | 1.42 (0.83-2.42) | 0.32   |
| High                                                         | 0.78 (0.52-1.16) | 0.32 | 0.89 (0.59-1.34) | 0.69   | 1.00 (0.58-1.71) | 0.99   |
| <b>Transplant Center</b>                                     |                  |      |                  |        |                  |        |
| Yes                                                          | ref              |      | ref              |        | ref              |        |
| No                                                           | 0.78 (0.54-1.11) | 0.29 | 0.84 (0.61-1.16) | 0.39   | 0.74 (0.48-1.12) | 0.26   |
| <b>Urban/Rural</b>                                           |                  |      |                  |        |                  |        |
| Urban                                                        | ref              |      | ref              |        | ref              |        |
| Rural                                                        | 1.11 (0.97-1.26) | 0.22 | 1.00 (0.86-1.16) | 0.98   | 0.98 (0.81-1.19) | 0.88   |
| <b>Driving distance to closest transplant center (miles)</b> |                  |      |                  |        |                  |        |
| <200                                                         | ref              |      | ref              |        | ref              |        |
| 200-<500                                                     | 0.91 (0.77-1.07) | 0.36 | 0.90 (0.75-1.08) | 0.37   | 0.90 (0.71-1.14) | 0.53   |
| ≥500 +                                                       | 0.92 (0.75-1.14) | 0.58 | 0.88 (0.70-1.11) | 0.39   | 0.84 (0.62-1.13) | 0.38   |

<sup>a</sup>False discovery rate (FDR) adjusted P value.

Adj HR, adjusted hazard ratio, CI, confidence intervals. Adj HR, adjusted hazard ratio, CI, confidence intervals.

**eTable 2.** Association Between Clinical and Clinical-Patient Factors and Referral, Wait-Listing and Transplantation in Patients Who Survived for >12 Months Following Meeting MELD-Na Criteria

| Characteristics                 | Referral         |                      | Waitlisting      |                      | Transplant       |                      |
|---------------------------------|------------------|----------------------|------------------|----------------------|------------------|----------------------|
| Total N patients                | 11,920           |                      | 11,920           |                      | 11,920           |                      |
| Outcome events, n               | 705              |                      | 338              |                      | 88               |                      |
|                                 | Adj HR (95% CI)  | P-value <sup>a</sup> | Adj HR (95% CI)  | P-value <sup>a</sup> | Adj HR (95% CI)  | P-value <sup>a</sup> |
| <b>Clinical characteristics</b> |                  |                      |                  |                      |                  |                      |
| <b>Cirrhosis etiology</b>       |                  |                      |                  |                      |                  |                      |
| HCV alone                       | ref              |                      | ref              |                      | ref              |                      |
| Alcohol alone                   | 0.40 (0.32-0.51) | <.0001               | 0.31 (0.22-0.43) | <.0001               | 0.25 (0.12-0.52) | 0.00                 |
| HCV & alcohol                   | 0.58 (0.46-0.72) | <.0001               | 0.49 (0.36-0.67) | <.0001               | 0.76 (0.41-1.42) | 0.67                 |
| NASH                            | 1.03 (0.80-1.32) | 0.85                 | 0.66 (0.46-0.94) | 0.05                 | 0.78 (0.39-1.56) | 0.71                 |
| Other                           | 0.67 (0.45-1.00) | 0.10                 | 0.78 (0.48-1.26) | 0.39                 | 0.84 (0.32-2.18) | 0.88                 |
| <b>Na-MELD score</b>            |                  |                      |                  |                      |                  |                      |
| <20                             | ref              |                      | ref              |                      | ref              |                      |
| 20-24                           | 1.02 (0.84-1.24) | 0.85                 | 0.95 (0.73-1.24) | 0.78                 | 1.26 (0.70-2.26) | 0.70                 |
| 25-29                           | 0.85 (0.67-1.08) | 0.31                 | 0.82 (0.59-1.14) | 0.32                 | 1.52 (0.80-2.88) | 0.51                 |
| 30 and higher                   | 0.89 (0.67-1.18) | 0.55                 | 0.53 (0.33-0.86) | 0.03                 | 1.09 (0.44-2.66) | 0.92                 |
| <b>Cirrhosis complications</b>  |                  |                      |                  |                      |                  |                      |
| Hepatic encephalopathy          | 2.51 (2.11-2.99) | <.0001               | 2.40 (1.88-3.06) | <.0001               | 3.02 (1.81-5.06) | 0.00                 |
| Ascites                         | 1.97 (1.57-2.46) | <.0001               | 1.67 (1.24-2.25) | 0.00                 | 2.05 (1.06-3.95) | 0.14                 |
| Varices                         | 2.11 (1.75-2.56) | <.0001               | 1.79 (1.37-2.33) | <.0001               | 1.28 (0.76-2.15) | 0.66                 |
| Hepatocellular cancer           | 1.66 (1.40-1.96) | <.0001               | 1.19 (0.93-1.53) | 0.23                 | 1.52 (0.94-2.46) | 0.29                 |
| <b>Cir-COM score</b>            |                  |                      |                  |                      |                  |                      |
| 0                               | ref              |                      | ref              |                      | ref              |                      |
| 1+0                             | 0.84 (0.69-1.02) | 0.14                 | 0.71 (0.54-0.94) | 0.04                 | 0.48 (0.27-0.84) | 0.07                 |
| 1+1                             | 0.51 (0.39-0.65) | <.0001               | 0.49 (0.35-0.70) | 0.00                 | 0.24 (0.11-0.53) | 0.01                 |
| >=3                             | 0.53 (0.42-0.67) | <.0001               | 0.44 (0.31-0.61) | <.0001               | 0.35 (0.19-0.66) | 0.01                 |
| <b>Socio-demographics</b>       |                  |                      |                  |                      |                  |                      |
| <b>Age group (years)</b>        |                  |                      |                  |                      |                  |                      |
| <55                             | ref              |                      | ref              |                      | ref              |                      |
| 55-59                           | 0.72 (0.58-0.91) | 0.02                 | 0.73 (0.52-1.01) | 0.10                 | 0.98 (0.49-1.98) | 0.96                 |
| 60-64                           | 0.79 (0.63-0.97) | 0.07                 | 0.71 (0.52-0.97) | 0.06                 | 0.92 (0.47-1.80) | 0.92                 |
| 65-70                           | 0.55 (0.42-0.72) | <.0001               | 0.57 (0.39-0.83) | 0.01                 | 0.72 (0.32-1.59) | 0.69                 |
| 70 and older                    | 0.08 (0.04-0.16) | <.0001               | 0.10 (0.04-0.24) | <.0001               | 0.28 (0.07-1.03) | 0.22                 |
| <b>Gender</b>                   |                  |                      |                  |                      |                  |                      |
| Female                          | ref              |                      | ref              |                      | ref              |                      |
| Male                            | 0.83 (0.54-1.26) | 0.51                 | 0.95 (0.50-1.80) | 0.92                 | 1.10 (0.26-4.61) | 0.92                 |
| <b>Race/ethnicity</b>           |                  |                      |                  |                      |                  |                      |
| White                           | ref              |                      | ref              |                      | ref              |                      |
| African American                | 0.72 (0.56-0.92) | 0.03                 | 0.70 (0.50-0.99) | 0.09                 | 0.72 (0.38-1.39) | 0.66                 |
| Hispanic                        | 0.81 (0.58-1.13) | 0.35                 | 0.65 (0.40-1.08) | 0.17                 | 0.82 (0.31-2.19) | 0.88                 |
| Other                           | 0.86 (0.53-1.40) | 0.60                 | 0.99 (0.50-1.94) | 0.98                 | 0.47 (0.06-3.49) | 0.71                 |

|                                                              |                  |      |                  |        |                  |      |
|--------------------------------------------------------------|------------------|------|------------------|--------|------------------|------|
| <b>Insurance status</b>                                      |                  |      |                  |        |                  |      |
| VA-Private                                                   | ref              |      | ref              |        | ref              |      |
| VA-Medicare                                                  | 0.92 (0.75-1.11) | 0.51 | 0.69 (0.53-0.88) | 0.01   | 0.57 (0.35-0.93) | 0.12 |
| VA-Medicaid                                                  | 0.85 (0.55-1.32) | 0.56 | 0.26 (0.11-0.65) | 0.01   | 0.23 (0.03-1.71) | 0.43 |
| VA only                                                      | 0.70 (0.56-0.88) | 0.01 | 0.41 (0.29-0.57) | <.0001 | 0.20 (0.09-0.43) | 0.00 |
| <b>Region</b>                                                |                  |      |                  |        |                  |      |
| Northeast                                                    | ref              |      | ref              |        | ref              |      |
| Midwest                                                      | 0.84 (0.59-1.19) | 0.46 | 0.84 (0.58-1.22) | 0.44   | 2.08 (0.93-4.66) | 0.27 |
| South                                                        | 0.84 (0.61-1.14) | 0.40 | 0.58 (0.41-0.82) | 0.01   | 1.50 (0.71-3.17) | 0.63 |
| West                                                         | 0.74 (0.52-1.06) | 0.20 | 0.43 (0.28-0.66) | 0.00   | 0.20 (0.05-0.80) | 0.12 |
| <b>Priority status</b>                                       |                  |      |                  |        |                  |      |
| 6-8                                                          | ref              |      | ref              |        | ref              |      |
| 1-3                                                          | 1.08 (0.85-1.38) | 0.59 | 0.98 (0.71-1.34) | 0.92   | 1.05 (0.56-1.97) | 0.92 |
| 4-5                                                          | 0.91 (0.72-1.16) | 0.56 | 0.73 (0.53-1.01) | 0.10   | 0.87 (0.46-1.64) | 0.88 |
| <b>Depression</b>                                            | 0.81 (0.69-0.96) | 0.04 | 0.87 (0.69-1.11) | 0.35   | 0.86 (0.53-1.41) | 0.77 |
| <b>Anxiety</b>                                               | 1.00 (0.80-1.24) | 0.97 | 0.91 (0.65-1.26) | 0.63   | 0.64 (0.30-1.38) | 0.60 |
| <b>Facility characteristics</b>                              |                  |      |                  |        |                  |      |
| <b>Complexity level</b>                                      |                  |      |                  |        |                  |      |
| Low/Median Complexity                                        | ref              |      | ref              |        | ref              |      |
| High Complexity                                              | 1.28 (0.88-1.85) | 0.33 | 1.72 (1.06-2.79) | 0.06   | 0.77 (0.32-1.86) | 0.77 |
| <b>Facility cirrhosis volume</b>                             |                  |      |                  |        |                  |      |
| Low                                                          | ref              |      | ref              |        | ref              |      |
| Medium                                                       | 0.76 (0.51-1.12) | 0.30 | 0.66 (0.39-1.12) | 0.19   | 1.24 (0.41-3.77) | 0.88 |
| Medium-high                                                  | 0.58 (0.36-0.94) | 0.07 | 0.66 (0.36-1.20) | 0.24   | 2.34 (0.67-8.12) | 0.48 |
| High                                                         | 0.62 (0.38-1.00) | 0.10 | 0.62 (0.35-1.13) | 0.19   | 1.12 (0.32-3.97) | 0.92 |
| <b>Transplant Center</b>                                     |                  |      |                  |        |                  |      |
| Yes                                                          | ref              |      | ref              |        | ref              |      |
| No                                                           | 0.80 (0.53-1.19) | 0.40 | 0.68 (0.45-1.02) | 0.11   | 0.54 (0.25-1.17) | 0.37 |
| <b>Urban/Rural</b>                                           |                  |      |                  |        |                  |      |
| Urban                                                        | ref              |      | ref              |        | ref              |      |
| Rural                                                        | 1.20 (1.02-1.41) | 0.08 | 1.19 (0.95-1.51) | 0.20   | 1.26 (0.79-2.01) | 0.66 |
| <b>Driving distance to closest transplant center (miles)</b> |                  |      |                  |        |                  |      |
| <200                                                         | ref              |      | ref              |        | ref              |      |
| 200-<500                                                     | 0.92 (0.75-1.15) | 0.56 | 0.92 (0.70-1.21) | 0.63   | 0.96 (0.58-1.59) | 0.92 |
| ≥500 +                                                       | 0.92 (0.70-1.21) | 0.61 | 0.97 (0.68-1.39) | 0.92   | 0.68 (0.31-1.52) | 0.66 |

<sup>a</sup>False discovery rate (FDR) adjusted P value

Adj HR, adjusted hazard ratio, CI, confidence intervals. Adj HR, adjusted hazard ratio, CI, confidence intervals.

**eTable 3.** Association Between Clinical and Clinical-Patient Factors and Referral, Wait-Listing and Transplantation in Patients With Persistently High MELD-Na (>15) Throughout Follow-Up

|                                 | Referral         |                      | Waitlisting      |                      | Transplant       |                      |
|---------------------------------|------------------|----------------------|------------------|----------------------|------------------|----------------------|
| Total N patients                | 17766            |                      | 17766            |                      | 17766            |                      |
| Outcome events, n               | 1393             |                      | 888              |                      | 447              |                      |
|                                 | Adj HR (95% CI)  | P-value <sup>a</sup> | Adj HR (95% CI)  | P-value <sup>a</sup> | Adj HR (95% CI)  | P-value <sup>a</sup> |
| <b>Clinical characteristics</b> |                  |                      |                  |                      |                  |                      |
| <b>Cirrhosis etiology</b>       |                  |                      |                  |                      |                  |                      |
| HCV alone                       | ref              |                      | ref              |                      | ref              |                      |
| Alcohol alone                   | 0.42 (0.36-0.50) | <.0001               | 0.36 (0.29-0.44) | <.0001               | 0.31 (0.23-0.41) | <.0001               |
| HCV and alcohol                 | 0.54 (0.46-0.64) | <.0001               | 0.48 (0.40-0.59) | <.0001               | 0.53 (0.40-0.70) | <.0001               |
| NASH                            | 0.95 (0.80-1.13) | 0.713                | 0.78 (0.63-0.96) | 0.036                | 0.86 (0.65-1.14) | 0.4065               |
| Other                           | 0.99 (0.77-1.28) | 0.989                | 1.02 (0.77-1.36) | 0.941                | 0.85 (0.56-1.30) | 0.573                |
| <b>Na-MELD score</b>            |                  |                      |                  |                      |                  |                      |
| <20                             | ref              |                      | ref              |                      | ref              |                      |
| 20-24                           | 1.16 (1.02-1.32) | 0.052                | 0.99 (0.85-1.17) | 0.944                | 0.84 (0.66-1.06) | 0.2647               |
| 25-29                           | 1.18 (1.01-1.38) | 0.073                | 1.13 (0.93-1.37) | 0.356                | 1.32 (1.02-1.72) | 0.0754               |
| 30 and higher                   | 1.14 (0.95-1.37) | 0.246                | 0.79 (0.62-1.02) | 0.137                | 1.17 (0.84-1.61) | 0.4614               |
| <b>Cirrhosis complications</b>  |                  |                      |                  |                      |                  |                      |
| Hepatic encephalopathy          | 2.12 (1.88-2.39) | <.0001               | 2.10 (1.81-2.44) | <.0001               | 2.38 (1.92-2.96) | <.0001               |
| Ascites                         | 1.73 (1.47-2.04) | <.0001               | 1.56 (1.28-1.89) | <.0001               | 1.82 (1.35-2.45) | 0.0004               |
| Varices                         | 1.87 (1.64-2.14) | <.0001               | 1.45 (1.23-1.71) | <.0001               | 1.18 (0.94-1.49) | 0.2679               |
| Hepatocellular cancer           | 1.10 (0.97-1.25) | 0.230                | 1.07 (0.92-1.25) | 0.501                | 1.38 (1.12-1.70) | 0.0072               |
| <b>Cir-COM score</b>            |                  |                      |                  |                      |                  |                      |
| 0                               | ref              |                      | ref              |                      | ref              |                      |
| 1+0                             | 0.71 (0.62-0.81) | <.0001               | 0.61 (0.52-0.72) | <.0001               | 0.55 (0.44-0.69) | <.0001               |
| 1+1                             | 0.48 (0.40-0.57) | <.0001               | 0.38 (0.30-0.48) | <.0001               | 0.29 (0.20-0.41) | <.0001               |
| >=3                             | 0.48 (0.41-0.57) | <.0001               | 0.33 (0.26-0.40) | <.0001               | 0.26 (0.19-0.35) | <.0001               |
| <b>Socio-demographics</b>       |                  |                      |                  |                      |                  |                      |
| <b>Age group (years)</b>        |                  |                      |                  |                      |                  |                      |
| 54 and younger                  | ref              |                      | ref              |                      | ref              |                      |
| 55 to 59                        | 0.74 (0.63-0.86) | 0.000                | 0.71 (0.58-0.86) | 0.001                | 0.70 (0.53-0.91) | 0.0231               |
| 60 to 64                        | 0.68 (0.59-0.79) | <.0001               | 0.58 (0.48-0.69) | <.0001               | 0.63 (0.49-0.81) | 0.0012               |
| 65 to 69                        | 0.41 (0.34-0.50) | <.0001               | 0.38 (0.30-0.48) | <.0001               | 0.36 (0.26-0.51) | <.0001               |
| 70 or older                     | 0.08 (0.05-0.13) | <.0001               | 0.06 (0.03-0.11) | <.0001               | 0.08 (0.04-0.19) | <.0001               |
| <b>Gender</b>                   |                  |                      |                  |                      |                  |                      |
| Female                          | ref              |                      | ref              |                      | ref              |                      |
| Male                            | 0.78 (0.58-1.05) | 0.168                | 0.71 (0.49-1.01) | 0.109                | 0.99 (0.54-1.83) | 0.9792               |
| <b>Race/ethnicity</b>           |                  |                      |                  |                      |                  |                      |
| White                           | ref              |                      | ref              |                      | ref              |                      |
| African American                | 0.79 (0.67-0.93) | 0.014                | 0.70 (0.57-0.87) | 0.002                | 0.69 (0.52-0.92) | 0.0267               |
| Hispanic                        | 1.00 (0.80-1.24) | 0.990                | 0.85 (0.64-1.13) | 0.386                | 0.76 (0.50-1.14) | 0.2831               |
| Other                           | 0.87 (0.62-1.23) | 0.582                | 0.88 (0.58-1.34) | 0.678                | 0.73 (0.37-1.43) | 0.4614               |
| <b>Insurance status</b>         |                  |                      |                  |                      |                  |                      |
| VA-Private                      | ref              |                      | ref              |                      | ref              |                      |
| VA-Medicare                     | 0.96 (0.84-1.10) | 0.738                | 0.92 (0.78-1.07) | 0.396                | 0.87 (0.70-1.08) | 0.3077               |
| VA-Medicaid                     | 0.72 (0.51-1.03) | 0.131                | 0.47 (0.29-0.76) | 0.005                | 0.46 (0.23-0.93) | 0.0655               |
| VA only                         | 0.73 (0.62-0.85) | 0.000                | 0.41 (0.33-0.51) | <.0001               | 0.30 (0.22-0.42) | <.0001               |
| <b>Region</b>                   |                  |                      |                  |                      |                  |                      |
| Northeast                       | ref              |                      | ref              |                      | ref              |                      |
| Midwest                         | 1.02 (0.78-1.34) | 0.922                | 0.84 (0.63-1.12) | 0.356                | 1.04 (0.70-1.55) | 0.891                |
| South                           | 0.94 (0.74-1.20) | 0.738                | 0.67 (0.52-0.87) | 0.005                | 0.88 (0.62-1.26) | 0.5918               |
| West                            | 0.72 (0.55-0.96) | 0.058                | 0.47 (0.35-0.65) | <.0001               | 0.55 (0.35-0.86) | 0.0231               |
| <b>Priority status</b>          |                  |                      |                  |                      |                  |                      |



|                                                              |                  |       |                  |       |                  |        |
|--------------------------------------------------------------|------------------|-------|------------------|-------|------------------|--------|
| 6-8                                                          | ref              |       | ref              |       | ref              |        |
| 1-3                                                          | 1.03 (0.87-1.21) | 0.824 | 0.90 (0.74-1.09) | 0.388 | 0.84 (0.64-1.09) | 0.2831 |
| 4-5                                                          | 0.86 (0.73-1.01) | 0.127 | 0.72 (0.59-0.87) | 0.002 | 0.70 (0.54-0.91) | 0.0231 |
| <b>Depression</b>                                            | 0.81 (0.72-0.92) | 0.003 | 0.79 (0.67-0.91) | 0.005 | 0.77 (0.62-0.95) | 0.0375 |
| <b>Anxiety</b>                                               | 1.04 (0.88-1.21) | 0.761 | 0.95 (0.78-1.17) | 0.749 | 0.96 (0.72-1.30) | 0.8765 |
| <b>Facility characteristics</b>                              |                  |       |                  |       |                  |        |
| <b>Complexity level</b>                                      |                  |       |                  |       |                  |        |
| Low/Median Complexity                                        | ref              |       | ref              |       | ref              |        |
| High Complexity                                              | 0.97 (0.73-1.29) | 0.891 | 0.98 (0.70-1.36) | 0.941 | 0.88 (0.55-1.41) | 0.687  |
| <b>Facility cirrhosis volume</b>                             |                  |       |                  |       |                  |        |
| Low                                                          | ref              |       | ref              |       | ref              |        |
| Medium                                                       | 0.84 (0.62-1.14) | 0.370 | 0.89 (0.62-1.27) | 0.661 | 0.89 (0.53-1.49) | 0.7255 |
| Medium-high                                                  | 0.91 (0.64-1.31) | 0.738 | 1.12 (0.74-1.70) | 0.710 | 1.49 (0.83-2.69) | 0.2831 |
| High                                                         | 0.75 (0.52-1.08) | 0.193 | 0.93 (0.61-1.42) | 0.823 | 0.96 (0.53-1.75) | 0.9177 |
| <b>Transplant Center</b>                                     |                  |       |                  |       |                  |        |
| Yes                                                          | ref              |       | ref              |       | ref              |        |
| No                                                           | 0.75 (0.54-1.05) | 0.157 | 0.77 (0.55-1.09) | 0.234 | 0.69 (0.44-1.08) | 0.1945 |
| <b>Urban/Rural</b>                                           |                  |       |                  |       |                  |        |
| Urban                                                        | ref              |       | ref              |       | ref              |        |
| Rural                                                        | 1.12 (0.99-1.26) | 0.138 | 0.99 (0.86-1.16) | 0.944 | 0.94 (0.76-1.16) | 0.6381 |
| <b>Driving distance to closest transplant center (miles)</b> |                  |       |                  |       |                  |        |
| <200                                                         | ref              |       | ref              |       | ref              |        |
| 200-<500                                                     | 0.83 (0.71-0.97) | 0.052 | 0.86 (0.72-1.04) | 0.214 | 0.80 (0.62-1.03) | 0.1632 |
| ≥500                                                         | 0.92 (0.75-1.13) | 0.582 | 0.93 (0.73-1.18) | 0.678 | 0.81 (0.58-1.13) | 0.3077 |

<sup>a</sup>False discovery rate (FDR) adjusted P value

Adj HR, adjusted hazard ratio, CI, confidence intervals. Adj HR, adjusted hazard ratio, CI, confidence intervals.

**eTable 4.** Association Between Clinical and Clinical-Patient Factors and Referral, Wait-Listing and Transplantation in Patients With Complete Data on all Covariates

|                                 | Referral         |                      | Waitlisting      |                      | Transplantation  |                      |
|---------------------------------|------------------|----------------------|------------------|----------------------|------------------|----------------------|
| Total N patients                | 24918            |                      | 24918            |                      | 24918            |                      |
| Outcome events, n               | 1389             |                      | 923              |                      | 530              |                      |
|                                 | Adj HR (95% CI)  | P-value <sup>a</sup> | Adj HR (95% CI)  | P-value <sup>a</sup> | Adj HR (95% CI)  | P-value <sup>a</sup> |
| <b>Clinical characteristics</b> |                  |                      |                  |                      |                  |                      |
| <b>Cirrhosis etiology</b>       |                  |                      |                  |                      |                  |                      |
| HCV alone                       | ref              |                      | ref              |                      | ref              |                      |
| Alcohol alone                   | 0.38 (0.33-0.45) | <.0001               | 0.33 (0.27-0.40) | <.0001               | 0.29 (0.22-0.38) | <.0001               |
| HCV and alcohol                 | 0.55 (0.47-0.64) | <.0001               | 0.52 (0.43-0.62) | <.0001               | 0.59 (0.46-0.75) | <.0001               |
| NASH                            | 0.93 (0.78-1.10) | 0.50                 | 0.87 (0.71-1.07) | 0.27                 | 1.00 (0.77-1.30) | 0.97                 |
| Other                           | 0.63 (0.48-0.83) | 0.00                 | 0.59 (0.43-0.81) | 0.00                 | 0.52 (0.34-0.80) | 0.01                 |
| <b>Na-MELD score</b>            |                  |                      |                  |                      |                  |                      |
| <20                             | ref              |                      | ref              |                      | ref              |                      |
| 20-24                           | 1.27 (1.09-1.49) | 0.01                 | 1.24 (1.02-1.51) | 0.06                 | 1.53 (1.20-1.96) | 0.00                 |
| 25-29                           | 1.53 (1.21-1.95) | 0.00                 | 1.34 (0.99-1.80) | 0.10                 | 1.26 (0.83-1.92) | 0.42                 |
| 30 and higher                   | 1.30 (0.92-1.85) | 0.21                 | 1.03 (0.70-1.51) | 0.92                 | 1.30 (0.79-2.12) | 0.43                 |
| <b>Cirrhosis complications</b>  |                  |                      |                  |                      |                  |                      |
| Hepatic encephalopathy          | 2.27 (2.02-2.55) | <.0001               | 2.22 (1.93-2.56) | <.0001               | 2.43 (2.00-2.94) | <.0001               |
| Ascites                         | 2.12 (1.83-2.46) | <.0001               | 2.00 (1.68-2.39) | <.0001               | 2.46 (1.92-3.16) | <.0001               |
| Varices                         | 2.26 (1.97-2.58) | <.0001               | 2.11 (1.80-2.48) | <.0001               | 1.73 (1.40-2.14) | <.0001               |
| Hepatocellular cancer           | 1.70 (1.50-1.92) | <.0001               | 1.59 (1.37-1.84) | <.0001               | 1.88 (1.55-2.27) | <.0001               |
| <b>Cir-COM score</b>            |                  |                      |                  |                      |                  |                      |
| 0                               | ref              |                      | ref              |                      | ref              |                      |
| 1+0                             | 0.75 (0.65-0.86) | <.0001               | 0.67 (0.57-0.78) | <.0001               | 0.59 (0.48-0.73) | <.0001               |
| 1+1                             | 0.50 (0.42-0.60) | <.0001               | 0.42 (0.34-0.52) | <.0001               | 0.31 (0.23-0.42) | <.0001               |
| >=3                             | 0.53 (0.45-0.63) | <.0001               | 0.36 (0.29-0.45) | <.0001               | 0.27 (0.20-0.36) | <.0001               |
| <b>Depression</b>               | 0.82 (0.72-0.92) | 0.00                 | 0.88 (0.76-1.01) | 0.12                 | 0.89 (0.73-1.08) | 0.34                 |
| <b>Anxiety</b>                  | 0.97 (0.83-1.14) | 0.74                 | 0.87 (0.72-1.07) | 0.27                 | 0.91 (0.69-1.19) | 0.59                 |
| <b>Socio-demographics</b>       |                  |                      |                  |                      |                  |                      |
| <b>Age group (years)</b>        |                  |                      |                  |                      |                  |                      |
| 54 and younger                  | ref              |                      | ref              |                      | ref              |                      |
| 55 to 59                        | 0.81 (0.70-0.95) | 0.02                 | 0.78 (0.64-0.93) | 0.02                 | 0.77 (0.60-0.99) | 0.08                 |
| 60 to 64                        | 0.75 (0.65-0.87) | 0.00                 | 0.62 (0.52-0.74) | <.0001               | 0.65 (0.52-0.83) | 0.00                 |
| 65 to 69                        | 0.48 (0.39-0.58) | <.0001               | 0.45 (0.36-0.56) | <.0001               | 0.46 (0.35-0.63) | <.0001               |
| 70 and older                    | 0.10 (0.06-0.16) | <.0001               | 0.06 (0.03-0.12) | <.0001               | 0.05 (0.02-0.14) | <.0001               |
| <b>Gender</b>                   |                  |                      |                  |                      |                  |                      |
| Female                          | ref              |                      | ref              |                      | ref              |                      |
| Male                            | 0.83 (0.62-1.10) | 0.27                 | 0.84 (0.59-1.21) | 0.44                 | 1.09 (0.64-1.87) | 0.79                 |
| <b>Race/ethnicity</b>           |                  |                      |                  |                      |                  |                      |
| White                           | ref              |                      | ref              |                      | ref              |                      |
| African American                | 0.83 (0.71-0.98) | 0.05                 | 0.81 (0.67-0.98) | 0.06                 | 0.84 (0.66-1.09) | 0.30                 |
| Hispanic                        | 1.22 (0.99-1.52) | 0.12                 | 1.01 (0.76-1.33) | 0.97                 | 0.92 (0.63-1.34) | 0.76                 |

|                                                              |                  |      |                  |        |                  |        |
|--------------------------------------------------------------|------------------|------|------------------|--------|------------------|--------|
| Other                                                        | 1.14 (0.84-1.56) | 0.50 | 1.04 (0.70-1.54) | 0.91   | 0.98 (0.56-1.72) | 0.96   |
| <b>Priority status</b>                                       |                  |      |                  |        |                  |        |
| 6-8                                                          | ref              |      | ref              |        | ref              |        |
| 1-3                                                          | 1.03 (0.87-1.21) | 0.79 | 0.90 (0.74-1.08) | 0.35   | 0.79 (0.62-1.01) | 0.11   |
| 4-5                                                          | 0.83 (0.71-0.98) | 0.05 | 0.71 (0.59-0.85) | 0.00   | 0.71 (0.56-0.90) | 0.01   |
| <b>Insurance status</b>                                      |                  |      |                  |        |                  |        |
| VA-Private                                                   | ref              |      | ref              |        | ref              |        |
| VA-Medicare                                                  | 0.97 (0.85-1.11) | 0.72 | 0.92 (0.79-1.07) | 0.36   | 0.85 (0.70-1.04) | 0.21   |
| VA-Medicaid                                                  | 0.77 (0.55-1.08) | 0.19 | 0.35 (0.21-0.59) | 0.00   | 0.33 (0.17-0.66) | 0.00   |
| VA only                                                      | 0.81 (0.69-0.95) | 0.02 | 0.38 (0.31-0.47) | <.0001 | 0.27 (0.20-0.36) | <.0001 |
| <b>Region</b>                                                |                  |      |                  |        |                  |        |
| Northeast                                                    | ref              |      | ref              |        | ref              |        |
| Midwest                                                      | 0.94 (0.70-1.26) | 0.72 | 0.81 (0.62-1.07) | 0.22   | 0.86 (0.60-1.24) | 0.57   |
| South                                                        | 0.91 (0.70-1.19) | 0.58 | 0.64 (0.50-0.82) | 0.00   | 0.78 (0.57-1.07) | 0.21   |
| West                                                         | 0.70 (0.51-0.95) | 0.05 | 0.47 (0.35-0.63) | <.0001 | 0.47 (0.32-0.71) | 0.00   |
| <b>Facility characteristics</b>                              |                  |      |                  |        |                  |        |
| <b>Complexity level</b>                                      |                  |      |                  |        |                  |        |
| Low/Median Complexity                                        | ref              |      | ref              |        | ref              |        |
| High Complexity                                              | 1.04 (0.76-1.43) | 0.80 | 1.06 (0.77-1.45) | 0.81   | 0.84 (0.55-1.29) | 0.57   |
| <b>Facility cirrhosis volume</b>                             |                  |      |                  |        |                  |        |
| Low                                                          | ref              |      | ref              |        | ref              |        |
| Medium                                                       | 0.80 (0.58-1.10) | 0.25 | 0.83 (0.59-1.18) | 0.40   | 0.91 (0.57-1.45) | 0.76   |
| Medium-high                                                  | 0.83 (0.56-1.23) | 0.47 | 1.06 (0.71-1.58) | 0.84   | 1.53 (0.89-2.66) | 0.21   |
| High                                                         | 0.71 (0.48-1.06) | 0.16 | 0.89 (0.60-1.34) | 0.66   | 1.10 (0.63-1.92) | 0.79   |
| <b>Transplant Center</b>                                     |                  |      |                  |        |                  |        |
| Yes                                                          | ref              |      | ref              |        | ref              |        |
| No                                                           | 0.73 (0.50-1.06) | 0.16 | 0.72 (0.52-0.99) | 0.08   | 0.60 (0.39-0.91) | 0.03   |
| <b>Urban/Rural</b>                                           |                  |      |                  |        |                  |        |
| Urban                                                        | ref              |      | ref              |        | ref              |        |
| Rural                                                        | 1.21 (1.07-1.37) | 0.00 | 1.07 (0.93-1.24) | 0.43   | 1.05 (0.87-1.27) | 0.74   |
| <b>Driving distance to closest transplant center (miles)</b> |                  |      |                  |        |                  |        |
| <200                                                         | ref              |      | ref              |        | ref              |        |
| 200-<500                                                     | 0.94 (0.80-1.10) | 0.53 | 0.95 (0.80-1.14) | 0.66   | 0.94 (0.74-1.18) | 0.71   |
| ≥500                                                         | 0.94 (0.77-1.16) | 0.66 | 0.93 (0.74-1.17) | 0.64   | 0.90 (0.66-1.21) | 0.59   |

<sup>a</sup>False discovery rate (FDR) adjusted p-value.

Adj HR, adjusted hazard ratio, CI, confidence intervals. Adj HR, adjusted hazard ratio, CI, confidence intervals.

**eTable 5.** Association Between Clinical and Clinical-Patient Factors and Referral, Wait-Listing and Transplantation in Patients Who Entered the Study Cohort Before vs After the Implementation of Organ Allocation Policy (Regional Share 35) in June 2013

|                                 | Referral                |                         | Waitlisting             |                         | Transplant              |                         |
|---------------------------------|-------------------------|-------------------------|-------------------------|-------------------------|-------------------------|-------------------------|
|                                 | Before 01/01/2013       | After 01/01/2013        | Before 01/01/2013       | After 01/01/2013        | Before 01/01/2013       | After 01/01/2013        |
| <b>Total N patients</b>         | <b>11686</b>            | <b>22808</b>            | <b>11686</b>            | <b>22808</b>            | <b>11686</b>            | <b>22808</b>            |
| <b>Outcome events, n</b>        | <b>747</b>              | <b>989</b>              | <b>512</b>              | <b>674</b>              | <b>308</b>              | <b>361</b>              |
|                                 | <b>Adj HR (95% CI)</b>  |                         |                         |                         |                         |                         |
| <b>Clinical characteristics</b> |                         |                         |                         |                         |                         |                         |
| <b>Cirrhosis etiology</b>       |                         |                         |                         |                         |                         |                         |
| HCV alone                       | ref                     | ref                     | ref                     | ref                     | ref                     | ref                     |
| Alcohol alone                   | <b>0.38 (0.31-0.47)</b> | <b>0.38 (0.31-0.46)</b> | <b>0.30 (0.23-0.39)</b> | <b>0.34 (0.27-0.43)</b> | <b>0.25 (0.18-0.36)</b> | <b>0.33 (0.24-0.45)</b> |
| HCV & alcohol                   | <b>0.54 (0.44-0.66)</b> | <b>0.55 (0.45-0.66)</b> | <b>0.57 (0.45-0.73)</b> | <b>0.46 (0.37-0.58)</b> | <b>0.61 (0.44-0.83)</b> | <b>0.55 (0.40-0.75)</b> |
| NASH                            | 0.78 (0.60-1.02)        | 0.97 (0.79-1.18)        | <b>0.71 (0.52-0.95)</b> | 0.81 (0.64-1.03)        | 0.76 (0.52-1.10)        | 1.02 (0.75-1.40)        |
| Other                           | 0.76 (0.53-1.09)        | 0.72 (0.53-0.98)        | 0.65 (0.43-0.97)        | 0.69 (0.49-0.98)        | 0.60 (0.35-1.01)        | 0.71 (0.44-1.14)        |
| <b>Na-MELD score</b>            |                         |                         |                         |                         |                         |                         |
| <20                             | ref                     | ref                     | ref                     | ref                     | ref                     | ref                     |
| 20-24                           | <b>1.70 (1.41-2.04)</b> | <b>1.86 (1.58-2.18)</b> | 0.67 (0.54-0.84)        | 0.73 (0.59-0.89)        | 0.66 (0.48-0.91)        | 0.73 (0.54-0.97)        |
| 25-29                           | <b>1.73 (1.38-2.17)</b> | <b>2.02 (1.65-2.48)</b> | 0.99 (0.75-1.31)        | <b>1.38 (1.05-1.80)</b> | 1.15 (0.79-1.66)        | <b>1.54 (1.04-2.28)</b> |
| 30 and higher                   | <b>1.44 (1.10-1.89)</b> | <b>2.28 (1.80-2.88)</b> | 0.98 (0.64-1.59)        | <b>1.58 (1.16-2.15)</b> | 0.94 (0.59-1.50)        | <b>1.77 (1.15-2.74)</b> |
| <b>Cirrhosis complications</b>  |                         |                         |                         |                         |                         |                         |
| Hepatic encephalopathy          | <b>3.22 (2.67-3.89)</b> | <b>1.73 (1.52-1.98)</b> | <b>2.78 (2.25-3.43)</b> | <b>1.79 (1.53-2.10)</b> | <b>2.74 (2.09-3.58)</b> | <b>1.85 (1.49-2.30)</b> |
| Ascites                         | <b>1.83 (1.49-2.26)</b> | <b>2.22 (1.86-2.64)</b> | <b>1.72 (1.36-2.18)</b> | <b>2.05 (1.67-2.52)</b> | <b>1.79 (1.31-2.43)</b> | <b>2.67 (1.98-3.61)</b> |
| Varices                         | <b>1.85 (1.54-2.21)</b> | <b>2.81 (2.39-3.31)</b> | <b>1.52 (1.24-1.88)</b> | <b>2.37 (1.96-2.88)</b> | <b>1.38 (1.06-1.81)</b> | <b>1.88 (1.45-2.44)</b> |
| Hepatocellular cancer           | <b>1.50 (1.27-1.77)</b> | <b>1.91 (1.65-2.21)</b> | <b>1.33 (1.09-1.62)</b> | <b>1.97 (1.65-2.34)</b> | <b>1.65 (1.29-2.12)</b> | <b>2.33 (1.85-2.93)</b> |
| <b>Cir-COM score</b>            |                         |                         |                         |                         |                         |                         |
| 0                               | ref                     | ref                     | ref                     | ref                     | ref                     | ref                     |
| 1+0                             | 0.81 (0.67-0.97)        | <b>0.74 (0.63-0.87)</b> | <b>0.61 (0.49-0.76)</b> | <b>0.65 (0.53-0.78)</b> | <b>0.56 (0.42-0.75)</b> | <b>0.57 (0.44-0.74)</b> |
| 1+1                             | <b>0.55 (0.43-0.70)</b> | <b>0.43 (0.34-0.53)</b> | <b>0.45 (0.34-0.60)</b> | <b>0.32 (0.24-0.43)</b> | <b>0.31 (0.21-0.47)</b> | <b>0.26 (0.17-0.39)</b> |
| >=3                             | <b>0.49 (0.39-0.62)</b> | <b>0.55 (0.45-0.67)</b> | <b>0.36 (0.27-0.47)</b> | <b>0.36 (0.28-0.46)</b> | <b>0.30 (0.21-0.44)</b> | <b>0.31 (0.22-0.44)</b> |
| <b>Socio-demographics</b>       |                         |                         |                         |                         |                         |                         |
| <b>Age group (years)</b>        |                         |                         |                         |                         |                         |                         |
| 54 and younger                  | ref                     | ref                     | ref                     | ref                     | ref                     | ref                     |
| 55 to 59                        | 0.89 (0.73-1.09)        | <b>0.72 (0.59-0.87)</b> | 0.85 (0.67-1.08)        | <b>0.66 (0.52-0.84)</b> | 0.88 (0.64-1.21)        | <b>0.63 (0.46-0.86)</b> |
| 60 to 64                        | <b>0.79 (0.65-0.96)</b> | <b>0.69 (0.57-0.83)</b> | <b>0.65 (0.52-0.83)</b> | <b>0.63 (0.50-0.78)</b> | 0.80 (0.59-1.09)        | <b>0.58 (0.43-0.78)</b> |
| 65 to 69                        | <b>0.43 (0.31-0.58)</b> | <b>0.44 (0.36-0.55)</b> | <b>0.47 (0.34-0.67)</b> | <b>0.50 (0.39-0.63)</b> | <b>0.53 (0.34-0.83)</b> | <b>0.46 (0.33-0.64)</b> |
| 70 or older                     | <b>0.03 (0.01-0.12)</b> | <b>0.10 (0.06-0.16)</b> | <b>0.07 (0.03-0.20)</b> | <b>0.07 (0.04-0.14)</b> | <b>0.07 (0.02-0.29)</b> | <b>0.08 (0.03-0.19)</b> |
| <b>Gender</b>                   |                         |                         |                         |                         |                         |                         |

|                                  |                         |                         |                         |                         |                         |                         |
|----------------------------------|-------------------------|-------------------------|-------------------------|-------------------------|-------------------------|-------------------------|
| Female                           |                         |                         |                         |                         |                         |                         |
| Male                             | 0.76 (0.51-1.12)        | 0.92 (0.65-1.30)        | 0.84 (0.52-1.37)        | 0.84 (0.56-1.27)        | 1.24 (0.60-2.55)        | 1.52 (0.74-3.09)        |
| <b>Race/ethnicity</b>            |                         |                         |                         |                         |                         |                         |
| White                            | ref                     | ref                     | ref                     | ref                     | ref                     | ref                     |
| African American                 | 0.79 (0.63-0.99)        | 0.82 (0.67-1.01)        | <b>0.69 (0.52-0.90)</b> | 0.83 (0.65-1.06)        | 0.71 (0.51-0.99)        | 0.87 (0.63-1.20)        |
| Hispanic                         | 1.12 (0.84-1.50)        | 1.13 (0.87-1.48)        | 0.81 (0.55-1.18)        | 1.07 (0.78-1.47)        | 0.61 (0.36-1.03)        | 1.20 (0.79-1.83)        |
| Other                            | 0.81 (0.48-1.37)        | 1.38 (0.91-2.07)        | 0.90 (0.51-1.58)        | 1.13 (0.69-1.85)        | 0.79 (0.35-1.78)        | 1.35 (0.73-2.52)        |
| <b>Insurance status</b>          |                         |                         |                         |                         |                         |                         |
| VA-Private                       | ref                     | ref                     | ref                     | ref                     | ref                     | ref                     |
| VA-Medicare                      | 1.05 (0.87-1.27)        | 0.96 (0.82-1.13)        | 0.91 (0.74-1.12)        | 0.85 (0.71-1.02)        | 0.87 (0.67-1.13)        | 0.79 (0.62-1.01)        |
| VA-Medicaid                      | 0.75 (0.48-1.19)        | 0.66 (0.42-1.05)        | <b>0.50 (0.28-0.89)</b> | <b>0.36 (0.18-0.70)</b> | 0.48 (0.22-1.05)        | 0.40 (0.17-0.93)        |
| VA only                          | 0.81 (0.65-1.01)        | <b>0.72 (0.59-0.87)</b> | <b>0.34 (0.26-0.46)</b> | <b>0.48 (0.37-0.62)</b> | <b>0.20 (0.13-0.31)</b> | <b>0.40 (0.28-0.57)</b> |
| <b>Region</b>                    |                         |                         |                         |                         |                         |                         |
| Northeast                        | ref                     | ref                     | ref                     | ref                     | ref                     | ref                     |
| Midwest                          | 0.68 (0.48-0.96)        | 1.18 (0.85-1.63)        | 0.74 (0.53-1.04)        | 1.03 (0.73-1.46)        | 1.12 (0.71-1.76)        | 0.96 (0.62-1.50)        |
| South                            | 0.82 (0.61-1.11)        | 0.92 (0.68-1.23)        | <b>0.64 (0.47-0.87)</b> | 0.73 (0.53-1.00)        | 1.09 (0.73-1.62)        | 0.74 (0.50-1.09)        |
| West                             | 0.77 (0.55-1.09)        | <b>0.64 (0.45-0.90)</b> | <b>0.50 (0.35-0.72)</b> | <b>0.47 (0.32-0.70)</b> | 0.57 (0.35-0.93)        | <b>0.44 (0.27-0.73)</b> |
| <b>Priority status</b>           |                         |                         |                         |                         |                         |                         |
| 6-8                              | ref                     | ref                     | ref                     | ref                     | ref                     | ref                     |
| 1-3                              | 0.92 (0.73-1.16)        | 1.13 (0.93-1.36)        | 0.81 (0.63-1.05)        | 0.90 (0.73-1.12)        | 0.74 (0.54-1.03)        | 0.74 (0.56-0.97)        |
| 4-5                              | 0.82 (0.66-1.03)        | 0.81 (0.67-0.98)        | <b>0.67 (0.52-0.87)</b> | <b>0.67 (0.54-0.84)</b> | 0.69 (0.50-0.96)        | <b>0.61 (0.46-0.81)</b> |
| <b>Depression</b>                | <b>0.80 (0.67-0.94)</b> | <b>0.82 (0.71-0.95)</b> | 0.85 (0.69-1.03)        | 0.86 (0.73-1.03)        | 0.89 (0.69-1.15)        | 0.87 (0.69-1.11)        |
| <b>Anxiety</b>                   | 0.99 (0.79-1.24)        | 0.98 (0.82-1.18)        | 0.82 (0.62-1.09)        | 0.96 (0.77-1.21)        | 0.85 (0.58-1.23)        | 0.92 (0.67-1.26)        |
| <b>Facility characteristics</b>  |                         |                         |                         |                         |                         |                         |
| <b>Complexity level</b>          |                         |                         |                         |                         |                         |                         |
| Low/Median Complexity            | ref                     | ref                     | ref                     | ref                     | ref                     | ref                     |
| High Complexity                  | 1.14 (0.79-1.65)        | 1.03 (0.73-1.46)        | 1.06 (0.70-1.60)        | 1.16 (0.78-1.72)        | 0.72 (0.43-1.23)        | 1.12 (0.66-1.89)        |
| <b>Facility cirrhosis volume</b> |                         |                         |                         |                         |                         |                         |
| Low                              | ref                     | ref                     | ref                     | ref                     | ref                     | ref                     |
| Medium                           | 0.84 (0.56-1.24)        | 0.83 (0.58-1.19)        | 0.91 (0.58-1.44)        | 0.83 (0.54-1.26)        | 1.00 (0.56-1.79)        | 0.83 (0.46-1.47)        |
| Medium-high                      | 0.74 (0.46-1.18)        | 0.94 (0.60-1.45)        | 1.13 (0.67-1.90)        | 0.99 (0.60-1.63)        | 1.65 (0.84-3.24)        | 1.20 (0.62-2.36)        |
| High                             | 0.73 (0.46-1.16)        | 0.71 (0.45-1.12)        | 1.05 (0.62-1.77)        | 0.79 (0.48-1.31)        | 1.16 (0.58-2.29)        | 0.85 (0.43-1.69)        |
| <b>Transplant Center</b>         |                         |                         |                         |                         |                         |                         |
| Yes                              | ref                     | ref                     | ref                     | ref                     | ref                     | ref                     |
| No                               | 0.83 (0.57-1.23)        | <b>0.62 (0.41-0.93)</b> | 0.76 (0.52-1.12)        | 0.71 (0.47-1.09)        | 0.65 (0.39-1.07)        | 0.66 (0.39-1.11)        |
| <b>Urban/Rural</b>               |                         |                         |                         |                         |                         |                         |
| Urban                            | ref                     | ref                     | ref                     | ref                     | ref                     | ref                     |

|                                                      |                         |                  |                  |                  |                  |                  |
|------------------------------------------------------|-------------------------|------------------|------------------|------------------|------------------|------------------|
| Rural                                                | 1.12 (0.95-1.32)        | 1.16 (1.01-1.34) | 0.97 (0.80-1.18) | 1.11 (0.93-1.33) | 0.83 (0.65-1.07) | 1.14 (0.90-1.44) |
| <b>Distance to closest transplant center (miles)</b> |                         |                  |                  |                  |                  |                  |
| <200                                                 | ref                     | ref              | ref              | ref              | ref              | ref              |
| 200-<500                                             | <b>0.72 (0.58-0.88)</b> | 1.06 (0.88-1.29) | 0.91 (0.73-1.15) | 0.95 (0.76-1.18) | 1.06 (0.78-1.42) | 0.83 (0.62-1.11) |
| ≥500                                                 | 0.76 (0.58-0.98)        | 1.15 (0.90-1.46) | 0.85 (0.63-1.15) | 1.07 (0.81-1.42) | 1.00 (0.68-1.49) | 0.90 (0.62-1.31) |

Bold-face values indicate p-value <0.05 after adjustment for multiple comparisons using false discovery rate.

Adj HR, adjusted hazard ratio, CI, confidence intervals.

**eTable 6.** Association Between Clinical and Clinical-Patient Factors and Referral, Wait-Listing and Transplantation in Patients Who Entered the Study Cohort Before vs After Revisions to Awarding Hepatocellular Cancer Exception Points (October 2015)

|                                 | Referral                |                         | Waitlisting             |                         | Transplantation         |                         |
|---------------------------------|-------------------------|-------------------------|-------------------------|-------------------------|-------------------------|-------------------------|
|                                 | Before 10/01/2015       | After 10/01 2015        | Before 10/01/2015       | After 10/01 2015        | Before 10/01/2015       | After 10/01 2015        |
| <b>Total N patients</b>         | 29925                   | 4569                    | 29925                   | 4569                    | 29925                   | 4569                    |
| <b>Outcome events, n</b>        | 1573                    | 163                     | 1075                    | 111                     | 615                     | 54                      |
|                                 | <b>Ajd HR (95% CI)</b>  |                         |                         |                         |                         |                         |
| <b>Clinical characteristics</b> |                         |                         |                         |                         |                         |                         |
| <b>Cirrhosis etiology</b>       |                         |                         |                         |                         |                         |                         |
| HCV alone                       | ref                     | ref                     | ref                     | ref                     | ref                     | ref                     |
| Alcohol alone                   | <b>0.39 (0.33-0.45)</b> | <b>0.35 (0.21-0.59)</b> | <b>0.31 (0.26-0.37)</b> | <b>0.41 (0.21-0.78)</b> | <b>0.28 (0.22-0.36)</b> | 0.44 (0.16-1.21)        |
| HCV & alcohol                   | <b>0.56 (0.48-0.64)</b> | <b>0.43 (0.26-0.72)</b> | <b>0.51 (0.43-0.61)</b> | <b>0.42 (0.21-0.81)</b> | <b>0.59 (0.47-0.74)</b> | 0.50 (0.18-1.35)        |
| NASH                            | 0.85 (0.72-1.01)        | 1.21 (0.75-1.94)        | <b>0.68 (0.56-0.83)</b> | 1.64 (0.91-2.96)        | 0.78 (0.61-1.01)        | 2.49 (1.01-6.17)        |
| Other                           | <b>0.76 (0.59-0.96)</b> | 0.55 (0.23-1.28)        | <b>0.65 (0.50-0.86)</b> | 0.78 (0.31-1.98)        | <b>0.63 (0.43-0.91)</b> | 1.24 (0.33-4.68)        |
| <b>Na-MELD score</b>            |                         |                         |                         |                         |                         |                         |
| <20                             | ref                     | ref                     | ref                     | ref                     | ref                     | ref                     |
| 20-24                           | <b>1.82 (1.59-2.07)</b> | <b>1.56 (1.02-2.38)</b> | 0.66 (0.57-0.77)        | 1.25 (0.70-2.20)        | <b>0.65 (0.52-0.81)</b> | 1.68 (0.71-3.94)        |
| 25-29                           | <b>1.86 (1.58-2.18)</b> | <b>2.33 (1.39-3.91)</b> | 1.14 (0.93-1.40)        | 1.58 (0.69-3.63)        | 1.31 (0.99-1.74)        | 3.06 (1.06-8.84)        |
| 30 and higher                   | <b>1.80 (1.49-2.17)</b> | <b>2.71 (1.46-5.02)</b> | 0.85 (0.65-1.10)        | <b>3.74 (1.70-8.19)</b> | 1.27 (0.91-1.77)        | 4.80 (1.43-16.1)        |
| <b>Cirrhosis complications</b>  |                         |                         |                         |                         |                         |                         |
| Hepatic encephalopathy          | <b>2.44 (2.17-2.73)</b> | 0.85 (0.59-1.23)        | <b>2.33 (2.03-2.66)</b> | 1.09 (0.71-1.68)        | <b>2.36 (1.97-2.82)</b> | 1.12 (0.61-2.04)        |
| Ascites                         | <b>2.01 (1.75-2.32)</b> | <b>2.80 (1.85-4.26)</b> | <b>1.85 (1.57-2.18)</b> | <b>3.42 (2.06-5.69)</b> | <b>2.05 (1.64-2.56)</b> | <b>7.21 (3.11-16.7)</b> |
| Varices                         | <b>2.22 (1.96-2.52)</b> | <b>3.62 (2.34-5.60)</b> | <b>1.88 (1.62-2.18)</b> | <b>2.42 (1.49-3.91)</b> | <b>1.60 (1.32-1.95)</b> | 1.41 (0.75-2.65)        |
| Hepatocellular cancer           | <b>1.74 (1.55-1.95)</b> | 1.55 (1.07-2.25)        | <b>1.62 (1.41-1.86)</b> | <b>1.79 (1.12-2.84)</b> | <b>1.98 (1.66-2.35)</b> | 2.12 (1.11-4.04)        |
| <b>Cir-COM score</b>            |                         |                         |                         |                         |                         |                         |
| 0                               | ref                     | ref                     | ref                     | ref                     | ref                     | ref                     |
| 1+0                             | <b>0.76 (0.67-0.86)</b> | 0.90 (0.61-1.31)        | <b>0.62 (0.54-0.72)</b> | 0.68 (0.42-1.09)        | <b>0.56 (0.46-0.69)</b> | 0.57 (0.29-1.11)        |
| 1+1                             | <b>0.47 (0.40-0.56)</b> | <b>0.49 (0.28-0.86)</b> | <b>0.38 (0.31-0.47)</b> | <b>0.43 (0.21-0.87)</b> | <b>0.28 (0.21-0.38)</b> | 0.27 (0.09-0.81)        |
| >=3                             | <b>0.53 (0.46-0.63)</b> | <b>0.44 (0.26-0.74)</b> | <b>0.36 (0.29-0.44)</b> | <b>0.42 (0.22-0.79)</b> | <b>0.31 (0.24-0.40)</b> | 0.30 (0.12-0.76)        |
| <b>Socio-demographics</b>       |                         |                         |                         |                         |                         |                         |
| <b>Age group (years)</b>        |                         |                         |                         |                         |                         |                         |
| 54 and younger                  | ref                     | ref                     | ref                     | ref                     | ref                     | ref                     |
| 55 to 59                        | <b>0.78 (0.67-0.90)</b> | 0.97 (0.55-1.73)        | <b>0.77 (0.65-0.91)</b> | <b>0.37 (0.19-0.73)</b> | <b>0.74 (0.59-0.93)</b> | 0.61 (0.24-1.51)        |
| 60 to 64                        | <b>0.75 (0.65-0.86)</b> | 0.58 (0.33-1.02)        | <b>0.65 (0.55-0.77)</b> | <b>0.43 (0.24-0.77)</b> | <b>0.67 (0.54-0.83)</b> | 0.48 (0.21-1.11)        |
| 65 to 69                        | <b>0.44 (0.36-0.53)</b> | 0.54 (0.31-0.94)        | <b>0.50 (0.40-0.61)</b> | <b>0.32 (0.17-0.58)</b> | <b>0.50 (0.38-0.66)</b> | 0.28 (0.11-0.67)        |
| 70 or older                     | <b>0.04 (0.02-0.08)</b> | <b>0.22 (0.11-0.48)</b> | <b>0.07 (0.04-0.13)</b> | <b>0.05 (0.02-0.16)</b> | <b>0.08 (0.03-0.17)</b> | <b>0.05 (0.01-0.24)</b> |
| <b>Gender</b>                   |                         |                         |                         |                         |                         |                         |
| Female                          | ref                     | ref                     | ref                     | ref                     | ref                     | ref                     |
| Male                            | 0.78 (0.60-1.02)        | 1.66 (0.59-4.66)        | 0.90 (0.64-1.26)        | 0.69 (0.30-1.60)        | 1.48 (0.85-2.58)        | 0.97 (0.27-3.45)        |
| <b>Race/ethnicity</b>           |                         |                         |                         |                         |                         |                         |
| White                           | ref                     | ref                     | ref                     | ref                     | ref                     | ref                     |

|                                                              |                         |                         |                         |                         |                         |                  |
|--------------------------------------------------------------|-------------------------|-------------------------|-------------------------|-------------------------|-------------------------|------------------|
| African American                                             | <b>0.82 (0.70-0.96)</b> | 0.74 (0.42-1.31)        | 0.74 (0.62-0.89)        | 0.77 (0.39-1.51)        | <b>0.76 (0.60-0.97)</b> | 0.87 (0.33-2.27) |
| Hispanic                                                     | 1.15 (0.94-1.40)        | 1.33 (0.72-2.43)        | 0.98 (0.75-1.27)        | 1.12 (0.55-2.27)        | 0.85 (0.60-1.21)        | 1.67 (0.58-4.75) |
| Other                                                        | 0.93 (0.67-1.29)        | 2.28 (1.13-4.63)        | 1.00 (0.68-1.47)        | 1.16 (0.40-3.32)        | 0.93 (0.54-1.60)        | 2.23 (0.64-7.76) |
| <b>Insurance status</b>                                      |                         |                         |                         |                         |                         |                  |
| VA-Private                                                   | ref                     | ref                     | ref                     | ref                     | ref                     | ref              |
| VA-Medicare                                                  | 0.95 (0.84-1.08)        | 1.21 (0.82-1.79)        | <b>0.85 (0.73-0.98)</b> | 1.22 (0.76-1.94)        | <b>0.79 (0.66-0.95)</b> | 1.44 (0.75-2.78) |
| VA-Medicaid                                                  | 0.70 (0.50-0.97)        | 0.76 (0.18-3.28)        | <b>0.42 (0.27-0.66)</b> | 0.58 (0.08-4.41)        | <b>0.42 (0.23-0.77)</b> | 0.97 (0.12-8.04) |
| VA only                                                      | <b>0.75 (0.65-0.87)</b> | 0.69 (0.38-1.23)        | <b>0.40 (0.33-0.49)</b> | 0.65 (0.32-1.34)        | <b>0.28 (0.21-0.37)</b> | 0.67 (0.23-1.95) |
| <b>Region</b>                                                |                         |                         |                         |                         |                         |                  |
| Northeast                                                    | ref                     | ref                     | ref                     | ref                     | ref                     | ref              |
| Midwest                                                      | 0.94 (0.70-1.25)        | 1.11 (0.61-2.00)        | 0.86 (0.65-1.14)        | 0.64 (0.32-1.29)        | 1.05 (0.73-1.50)        | 0.46 (0.19-1.15) |
| South                                                        | 0.88 (0.68-1.14)        | 0.85 (0.48-1.48)        | 0.66 (0.51-0.85)        | 0.66 (0.36-1.19)        | 0.90 (0.66-1.24)        | 0.52 (0.24-1.12) |
| West                                                         | <b>0.68 (0.51-0.92)</b> | 0.75 (0.39-1.47)        | <b>0.47 (0.35-0.64)</b> | 0.42 (0.19-0.92)        | <b>0.53 (0.36-0.78)</b> | 0.21 (0.06-0.71) |
| <b>Priority status</b>                                       |                         |                         |                         |                         |                         |                  |
| 6-8                                                          | ref                     | ref                     | ref                     | ref                     | ref                     | ref              |
| 1-3                                                          | 0.97 (0.83-1.13)        | 1.40 (0.86-2.27)        | 0.89 (0.75-1.05)        | 0.61 (0.37-1.02)        | <b>0.76 (0.61-0.95)</b> | 0.68 (0.32-1.42) |
| 4-5                                                          | <b>0.81 (0.70-0.94)</b> | 0.75 (0.45-1.25)        | <b>0.68 (0.58-0.81)</b> | <b>0.51 (0.30-0.88)</b> | <b>0.65 (0.52-0.81)</b> | 0.67 (0.31-1.46) |
| <b>Depression</b>                                            | <b>0.82 (0.73-0.92)</b> | <b>0.83 (0.58-1.17)</b> | <b>0.85 (0.74-0.97)</b> | 0.92 (0.60-1.40)        | 0.89 (0.74-1.06)        | 0.72 (0.39-1.32) |
| <b>Anxiety</b>                                               | 1.00 (0.86-1.16)        | 0.75 (0.48-1.18)        | 0.91 (0.76-1.10)        | 0.71 (0.41-1.25)        | 0.83 (0.65-1.08)        | 1.08 (0.51-2.27) |
| <b>Facility characteristics</b>                              |                         |                         |                         |                         |                         |                  |
| <b>Complexity level</b>                                      |                         |                         |                         |                         |                         |                  |
| Low/Median Complexity                                        | ref                     | ref                     | ref                     | ref                     | ref                     | ref              |
| High Complexity                                              | 1.05 (0.78-1.43)        | 0.97 (0.49-1.94)        | 1.15 (0.84-1.57)        | 0.87 (0.38-1.99)        | 0.88 (0.58-1.32)        | 1.25 (0.44-3.50) |
| <b>Facility cirrhosis volume</b>                             |                         |                         |                         |                         |                         |                  |
| Low                                                          | ref                     | ref                     | ref                     | ref                     | ref                     | ref              |
| Medium                                                       | 0.82 (0.60-1.12)        | 0.72 (0.34-1.53)        | 0.81 (0.58-1.13)        | 1.28 (0.48-3.42)        | 0.84 (0.54-1.30)        | 1.83 (0.51-6.57) |
| Medium-high                                                  | 0.83 (0.57-1.22)        | 0.90 (0.38-2.13)        | 0.96 (0.64-1.42)        | 1.91 (0.62-5.86)        | 1.38 (0.82-2.31)        | 1.47 (0.35-6.24) |
| High                                                         | 0.72 (0.49-1.07)        | 0.71 (0.30-1.68)        | 0.85 (0.57-1.26)        | 1.32 (0.42-4.16)        | 0.97 (0.57-1.64)        | 0.89 (0.20-3.88) |
| <b>Transplant Center</b>                                     |                         |                         |                         |                         |                         |                  |
| Yes                                                          | ref                     | ref                     | ref                     | ref                     | ref                     | ref              |
| No                                                           | 0.73 (0.50-1.05)        | 0.87 (0.50-1.51)        | 0.76 (0.54-1.07)        | 0.78 (0.41-1.50)        | 0.64 (0.42-0.97)        | 1.14 (0.46-2.86) |
| <b>Urban/Rural</b>                                           |                         |                         |                         |                         |                         |                  |
| Urban                                                        | ref                     | ref                     | ref                     | ref                     | ref                     | ref              |
| Rural                                                        | <b>1.15 (1.03-1.29)</b> | 1.24 (0.88-1.75)        | 1.03 (0.90-1.18)        | 1.34 (0.89-2.03)        | 0.95 (0.79-1.14)        | 1.88 (1.05-3.34) |
| <b>Driving distance to closest transplant center (miles)</b> |                         |                         |                         |                         |                         |                  |
| <200                                                         | ref                     | ref                     | ref                     | ref                     | ref                     | ref              |
| 200-<500                                                     | 0.89 (0.76-1.03)        | 0.78 (0.52-1.17)        | 0.92 (0.78-1.10)        | 0.84 (0.51-1.36)        | 0.94 (0.75-1.18)        | 0.58 (0.30-1.10) |
| ≥500                                                         | 0.98 (0.80-1.19)        | 0.73 (0.43-1.25)        | 0.93 (0.75-1.17)        | 1.10 (0.59-2.06)        | 0.97 (0.72-1.30)        | 0.53 (0.20-1.38) |

Bold-face values indicate p-value <0.05 after adjustment for multiple comparisons using false discovery rate.

Adj HR, adjusted hazard ratio, CI, confidence intervals.



**eFigure.** Cohort Selection

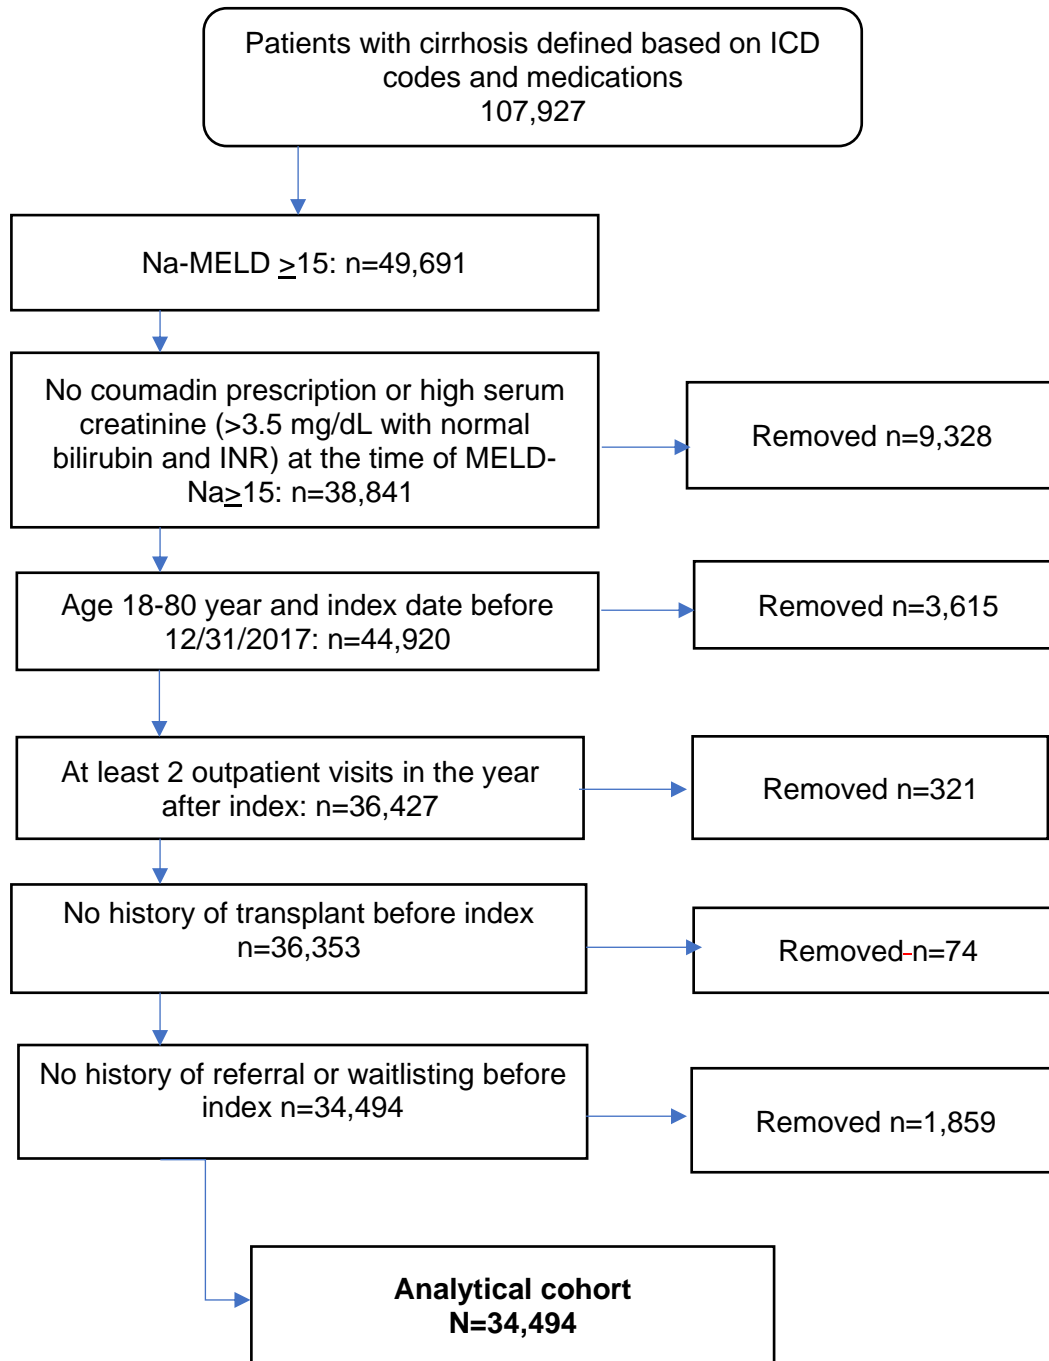

Supplement: jamainternmed-e212051-s001.pdf [file jamainternmed-e212051-s001.pdf]
